# Stochastic simulations reveal that dendritic spine morphology regulates synaptic plasticity in a deterministic manner

M. V. Holst\*, M. K. Bell\*, C. T. Lee, and P. Rangamani\*\*

Department of Mechanical and Aerospace Engineering,  
University of California San Diego, La Jolla CA 92093.

\*These authors contributed equally

\*\*To whom correspondence must be addressed: prangamani@ucsd.edu

## Abstract

Dendritic spines act as computational units and must adapt their responses according to their activation history. Calcium influx acts as the first signaling step during postsynaptic activation and is a determinant of synaptic weight change. Dendritic spines also come in a variety of sizes and shapes. To probe the relationship between calcium dynamics and spine morphology, we used a stochastic reaction-diffusion model of calcium dynamics in idealized and realistic geometries. We show that despite the stochastic nature of the various calcium channels, receptors, and pumps, spine size and shape can separately modulate calcium dynamics and subsequently synaptic weight updates in a deterministic manner. The relationships between calcium dynamics and spine morphology identified in idealized geometries also hold in realistic geometries suggesting that there are geometrically determined deterministic relationships that may modulate synaptic weight change.

## Keywords:

Calcium | dendritic spine | morphology | synaptic weight | spine apparatus

## Abbreviations:

|       |                                                                       |
|-------|-----------------------------------------------------------------------|
| AMPA  | $\alpha$ -amino-3-hydroxy-5-methyl-4-isoxazolepropionic Acid Receptor |
| BPAP  | Back Propagating Action Potential                                     |
| EPSP  | Excitatory Postsynaptic Potential                                     |
| LTD   | Long Term Depression                                                  |
| LTP   | Long Term Potentiation                                                |
| NCX   | Sodium-Calcium Exchanger                                              |
| NMDAR | <i>N</i> -methyl-D-aspartate Receptor                                 |
| PM    | Plasma Membrane                                                       |
| PMCA  | Plasma Membrane $\text{Ca}^{2+}$ -ATPase                              |
| PSD   | Postsynaptic Density                                                  |
| SERCA | Sarco/Endoplasmic Reticulum $\text{Ca}^{2+}$ -ATPase                  |
| SpApp | Spine Apparatus                                                       |
| STDP  | Spike-Timing Dependent Plasticity                                     |
| VSCC  | Voltage Sensitive Calcium Channel                                     |

## 24 1 Introduction

25 Dendritic spines are small protrusions along the dendrites of neurons that compartmentalize post-  
26 synaptic biochemical, electrical, and mechanical responses. These subcompartments house the  
27 majority of excitatory synapses and are key for neuronal communication and function (1, 2). Be-  
28 cause of their unique biochemical compartmentation capabilities, spines are thought of as compu-  
29 tational units that can modify their synaptic strength through a process called synaptic plasticity (1,  
30 3).

31 Calcium plays a key role as a second messenger in biochemical and physical modifications  
32 during synaptic plasticity, triggering downstream signaling cascades within dendritic spines, and  
33 the entire neuron (3–5). Efforts have also linked calcium levels to synaptic weight change (6–9).  
34 Synaptic weight update refers to the change in the strength of the postsynaptic response in the  
35 event of neurotransmitter release from the presynapse. Calcium levels have often been used as an  
36 indicator of the early events preceding the complex downstream signaling (7, 10–12), specifically  
37 the modulation of  $\alpha$ -amino-3-hydroxy-5-methyl-4-isoxazolepropionic Acid Receptor (AMPA) den-  
38 sity (13), and thus inform the synaptic weight update. An increase in synaptic weight is associated  
39 with Long Term Potentiation (LTP), while a decrease in synaptic weight is associated with Long  
40 Term Depression (LTD) (14, 15). While synaptic weight update requires a host of downstream  
41 signaling and mechanical interactions, the level of calcium can be thought of as an indicator of  
42 synaptic plasticity and weight (7, 16).

43 Dendritic spines have characteristic sizes and shapes that dynamically change over time in  
44 response to stimulus, and are associated with their function and synaptic plasticity (17). Just  
45 as whole cell shape is known to influence signaling dynamics (18–21), studies have specifically  
46 probed the interplay between calcium dynamics and dendritic spine morphology (4, 22–24). Due  
47 to the historical significance of dendritic spines as electrical subcompartments, the morphology of  
48 the spine neck has been implicated in regulating calcium signaling and longer spine necks were  
49 found to decouple spine-dendrite calcium signaling (25). Additional modeling work coupled actin-  
50 myosin contractions to cytoplasmic flow to identify two timescales of calcium motion, driven by  
51 flow and diffusion respectively, that depend on spine geometry (26). A combined analytical and  
52 numerical study showed how geometry and curvature gives rise to pseudo-harmonic functions that  
53 can predict the locations of maximum and minimum calcium concentration (23). More recently,  
54 we used a deterministic reaction-diffusion model to investigate dendritic spine morphology and  
55 ultrastructure, and found that dendritic spine volume-to-surface area ratios and the presence of  
56 spine apparatus modulate calcium levels (22).

57 Due the small volume of dendritic spines, stochastic calculations are important to gain insight  
58 into the spatiotemporal dynamics of spine calcium; there are approximately seven ions of calcium  
59 in a resting spine (24, 27). Due to their probabilistic nature and discrete number, calcium channels  
60 and receptors appear to behave stochastically (28–30). This indicates that the system leans to-  
61 wards stochasticity and it has been suggested that synaptic plasticity itself relies on stochasticity for  
62 robustness (28, 31, 32). In this work, using idealized and realistic spine geometries, we investigate  
63 the impact of shape and stochasticity on calcium dynamics and synaptic weight change. We seek  
64 to answer the following specific question: How do specific geometric parameters – namely shape  
65 and size of dendritic spines – influence calcium dynamics? To address these questions, we built a  
66 spatial, stochastic model of calcium dynamics in various dendritic spines geometries. We used ide-  
67 alized geometries to control for various geometric parameters and then extended our calculations  
68 to realistic geometries. We probed the influence of spine shape, volume, and volume-to-surface  
69 area ratio on calcium influx, variance of calcium dynamics, and the robustness of synaptic weight.  
70 We show that although calcium dynamics in individual spines is stochastic, the key readouts from

71 the model, including mean calcium and synaptic weight update, behave deterministically with re-  
 72 spect to the variation of geometric parameters.

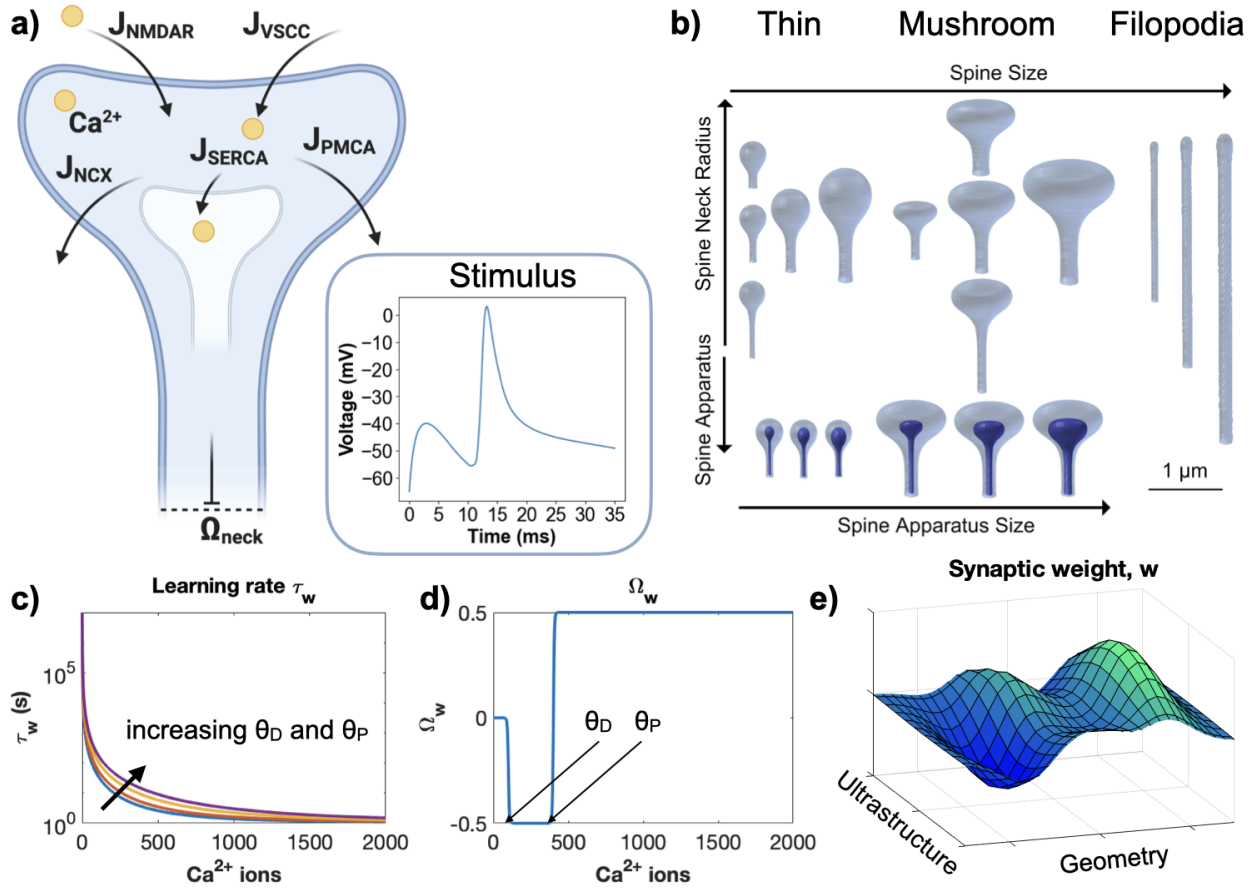

**Figure 1: Model overview.** a) Our stochastic model includes calcium influx through NMDAR and VSCC, calcium efflux to the extracellular space through PMCA and NCX pumps, and to the Spine Apparatus through SERCA pumps. Arrows indicate the movement of  $\text{Ca}^{2+}$  through the labeled pump, channel, or receptor.  $\Omega_{neck}$  represents the Dirichlet boundary condition at the base of the spine neck, at which the concentration of calcium ions is clamped to zero. Cytosolic calcium is buffered using mobile and immobile calcium buffers. Inset: A change in membrane potential triggered by an excitatory postsynaptic action potential (EPSP) and back propagating action potential (BPAP) acts as the model stimulus. b) The geometric factors considered in our model include spine shape, spine size, neck radius and length, and SpApp size. We investigate three spine shapes: thin, mushroom, and filopodia-shaped. Calcium levels determine the learning rate  $\tau_w$ , (c), and function  $\Omega_w$ , (d), that in turn determine synaptic weight, (e). The influence of geometry and ultrastructure on calcium signaling thus has an influence on synaptic weight.  $\theta_D$  and  $\theta_P$  represent the thresholds for long term depression and potentiation, respectively. Panel a) was generated using [biorender.com](https://biorender.com).

## 73 2 Results

74 In this work, we sought to decipher the contributions of spine size and shape to synaptic weight  
 75 change. We briefly summarize our model development strategy here as shown in Figure 1. We  
 76 conducted stochastic simulations of calcium influx through *N*-methyl-D-aspartate Receptor (NM-  
 77 DAR) and Voltage Sensitive Calcium Channels (VSCCs) based on (24). The system stimulus is  
 78 a Excitatory Postsynaptic Potential (EPSP) and Back Propagating Action Potential (BPAP) off-  
 79 set by 10 ms (24). Calcium ions leave the spine volume through the pumps on the plasma  
 80 membrane, Plasma Membrane  $\text{Ca}^{2+}$ -ATPase (PMCA) and Sodium-Calcium Exchanger (NCX),

81 and into the Spine Apparatus (SpApp) (if present) through Sarco/Endoplasmic Reticulum  $\text{Ca}^{2+}$ -  
 82 ATPase (SERCA). In addition, the base of the spine neck has a Dirichlet boundary condition  
 83 of calcium clamped to zero. Mobile and immobile buffers are present in the cytoplasm to re-  
 84 versibly bind calcium, and there is an additional exponential decay throughout the cytoplasm.  
 85 All simulations were performed using MCell (33–35) to capture the stochastic nature of calcium  
 86 dynamics in the small spine volumes and each simulation condition was run with 50 random  
 87 seeds. System configuration and analysis scripts are all available on Github <https://github.com/RangamaniLabUCSD/StochasticSpineSimulations>. Synaptic weight was calculated using an  
 88 ordinary differential equation dependent on the total number of calcium ions in the cytoplasm at  
 89 each time point, see Table 2 and Section 4.5. The rate of synaptic weight update depends on a  
 90 learning rate,  $\tau_w$ , and a thresholding function,  $\Omega_w$ , that are both dependent on calcium ion levels,  
 91 Figure 1c-d. We investigate how spine geometry and ultrastructure can influence synaptic weight  
 92 change (Figure 1e). Model geometries were selected as follows: idealized geometries of thin,  
 93 mushroom, and filopodia-shaped geometries from Alimohamadi *et al.* (36), see Supp. Table 3 and  
 94 4. For each geometry, the Postsynaptic Density (PSD) area was set as a fixed proportion of the  
 95 spine volume. We first investigate whether spine size has any effect on filopodia-shaped spines  
 96 (Figure 2), thin spines (Figure 3), and mushroom spines (Figure 4). Next we consider the role of  
 97 spine apparatus (Figure 5). Last we test the trends we find in idealized spines on realistic spine  
 98 geometries (Figure 6). Our results predict that synaptic weight change through calcium dynamics  
 99 is a deterministic function of geometric parameters of the spines (Figure 7). We note that our goal  
 100 is not to provide a function fit but to demonstrate trends. We discuss these results in detail below.  
 101

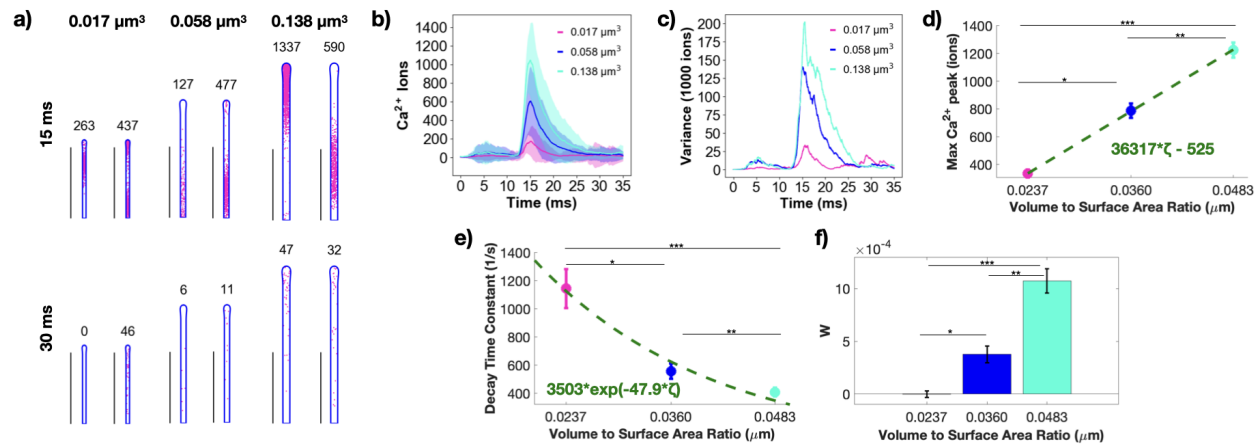

**Figure 2: Calcium dynamics and synaptic weight change in filopodia-shaped spines depend on spine size.** a) Spatial plots illustrating  $\text{Ca}^{2+}$  localization at 15 and 30 ms for filopodia-shaped spines with different volumes (0.017, 0.058 and  $0.138 \mu\text{m}^3$ ). The number above each geometry corresponds to the number of  $\text{Ca}^{2+}$  in that frame. Scale bars:  $2 \mu\text{m}$ . b) Mean (solid) and standard deviation (shaded area) of  $\text{Ca}^{2+}$  transients across 50 simulations for each of the three filopodia-shaped spine sizes. c) Variance of  $\text{Ca}^{2+}$  over time. d) The mean and standard error ( $n=50$ ) of the peak number of  $\text{Ca}^{2+}$  in different filopodia-shaped spine sizes shows statistically significant differences;  $p^* = 2.0262 \times 10^{-11}$ ;  $p^{**} = 9.898 \times 10^{-8}$ ;  $p^{***} = 4.362 \times 10^{-26}$  using a two-tailed  $t$ -test. We fit the trend in peak  $\text{Ca}^{2+}$  as a linear function of volume-to-surface area ratio,  $\zeta$ ;  $r^2 = 0.5521$  for the linear fit. e) The decay timescales of each  $\text{Ca}^{2+}$  transient are estimated by fitting with an exponential decay function  $c \cdot \exp(-kt)$ . The mean and standard error ( $n=50$ ) of the decay time constant,  $k$ , shows statistically significant differences across filopodia-shaped spine sizes;  $p^* = 1.6331 \times 10^{-4}$ ;  $p^{**} = 0.0209$ ;  $p^{***} = 1.3381 \times 10^{-6}$  from a two-tailed  $t$ -test. The mean decay time constants as a function of volume-to-surface area ratio,  $\zeta$ , was fit with an exponential  $a \cdot \exp(-b\zeta)$ ;  $r^2 = 0.203$  for the exponential fit. f) The mean and standard error ( $n=50$ ) of the calculated synaptic weight change at the last time point in the simulation for all filopodia-shaped spine sizes, plotted against the volume-to-surface area ratio, shows statistically significant differences between all cases;  $p^* = 2.7290 \times 10^{-5}$ ;  $p^{**} = 2.8626 \times 10^{-6}$ ;  $p^{***} = 1.6321 \times 10^{-14}$  from two-tailed  $t$ -test.

## 102 **2.1 Synaptic weight change depends on spine volume-to-surface ratio in filopodia-** 103 **shaped spines**

104 We begin our analysis with a simple question – does spine size alter synaptic weight change?  
105 To answer this question, we first examined filopodia-shaped spines. Dendritic filopodia are pre-  
106 cursors of dendritic spines and serve to bridge the gap between the dendrite and an axon that  
107 is passing by during synapse formation (37). These are highly motile elongated structures that  
108 resemble tubules (lengths of 2–20  $\mu\text{m}$  and neck diameters smaller than 0.3  $\mu\text{m}$ ). The simplicity of  
109 this geometry allows us to focus on the role of size alone in a simple spine geometry. We used  
110 spine geometries of three different volumes (0.017, 0.058 and 0.138  $\mu\text{m}^3$ ). Simulations revealed  
111 that the calcium dynamics in these tubule-shaped spines appeared to follow a ‘plug-flow’ behavior  
112 where at 15 ms, all the calcium is localized to one region (Figure 2a). This behavior is because  
113 of the narrow geometry of the spine, preventing dispersion of the calcium (see also Supplemental  
114 Movie S1). Next, we look at the temporal dynamics of calcium and note that the larger spines  
115 have larger numbers of calcium ions (Figure 2b) but also have a larger variance of calcium ions  
116 (Figure 2c). We further characterized the dynamics by considering the peak calcium values and  
117 decay time constants of the calcium transients versus the spine volume-to-surface area ratio. We  
118 chose the volume-to-surface area ratio as a geometric metric of spine morphology because it en-  
119 compasses both the cytosolic volume through which calcium diffuses and the surface area of the  
120 spine membrane through which calcium can enter and leave the system. Additional analyses with  
121 respect to spine volume are shown in Figure S1.

122 We note that, indeed, increasing spine size and therefore the volume-to-surface ratio, causes a  
123 linearly proportional and significant increase in peak calcium ions (Figure 2d). We also found that  
124 the decay time of calcium from the peak decreased with increasing volume-to-surface area ratios  
125 and satisfied an exponential dependence (Figure 2e). As spine size increases, the decay time  
126 constant decreases, showing that it takes longer for calcium to clear out of the larger spines and  
127 spines with larger volume-to-surface area ratios. Finally, we calculated the synaptic weight change  
128 (see Supplemental Section 4.5) and compared this value at 35 ms across volume-to-surface area  
129 ratios for the filopodia-shaped spines (Figure 2f). We observed that while the smallest spine had  
130 no observable weight change presumably because of the net low calcium influx, the weight change  
131 increases with increase in spine volume-to-surface-area ratio (Figure 2f). Thus, we find that even  
132 for a shape as simple as a filopodia-shaped spine, changes in spine volume-to-surface area ratio  
133 can dramatically alter calcium dynamics and synaptic weight change even in stochastic conditions  
134 suggesting a close coupling between spinogenesis and calcium handling.

## 135 **2.2 Thin and mushroom-shaped spines modulate synaptic weight changes as a** 136 **function of volume-to-surface area ratio**

137 We next asked if the relationships of spine size and synaptic weight change observed for filopodia-  
138 shaped spines (Figure 2) also holds for thin and mushroom-shaped spines. Thin and mushroom-  
139 shaped spines emerge from filopodia-shaped spines as spinogenesis progresses (37, 38). While  
140 it has been proposed that spines exist in a continuum of shapes (39), historically it has been useful  
141 to categorize spines into specific categories of shapes (40). Thin spines, with small heads and  
142 thin necks, have been classified as ‘write-enabled’ or learning spines due to their high motility.  
143 Mushroom spines, on the other hand, with bulbous heads and relatively wider necks, are termed  
144 ‘write-protected’ or memory spines due to their stability (41). Thin spines are characterized by  
145 a spherical head and we repeated the calcium influx simulations in thin spines of three different  
146 volumes (0.035, 0.119 and 0.283  $\mu\text{m}^3$ ) that were informed by the ranges found in the literature,

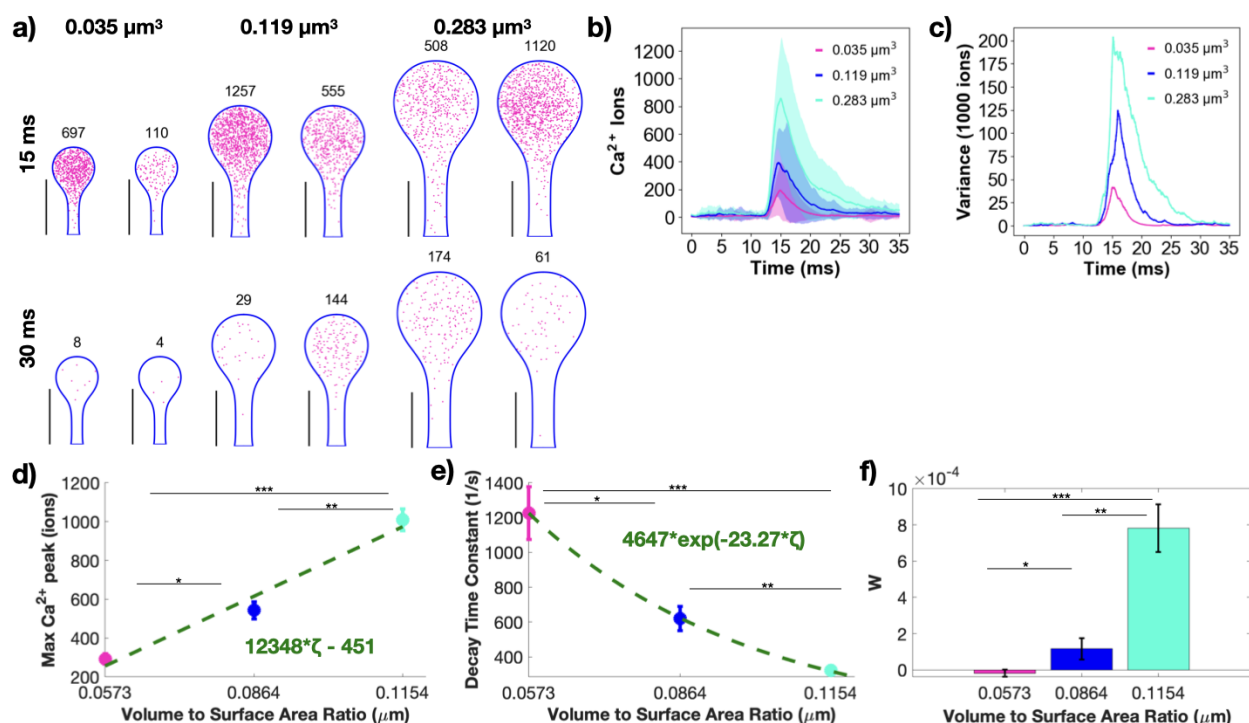

**Figure 3: Changing thin spine size modulates calcium dynamics and synaptic weight change.** a) Spatial plots illustrating  $\text{Ca}^{2+}$  localization at 15 and 30 ms for thin spines with different volumes 0.035, 0.119 and 0.283  $\mu\text{m}^3$ . The number above each geometry corresponds to the number of  $\text{Ca}^{2+}$  in the frame. Scale bars: 0.5  $\mu\text{m}$ . b) Mean (solid) and standard deviation (shaded area) of  $\text{Ca}^{2+}$  transients across 50 simulations for each of the three thin spine sizes. c) Variance of  $\text{Ca}^{2+}$  over time. d) The mean and standard error ( $n=50$ ) of the peak number of  $\text{Ca}^{2+}$  in different thin spine sizes shows statistically significant differences;  $p^* = 5.2641 \times 10^{-6}$ ;  $p^{**} = 2.7377 \times 10^{-9}$ ;  $p^{***} = 5.0036 \times 10^{-20}$  from two-tailed  $t$ -test. We fit the trend in peak  $\text{Ca}^{2+}$  as a linear function of volume-to-surface area ratio,  $\zeta$ ;  $r^2 = 0.4676$  for the linear fit. e) The decay timescales of each  $\text{Ca}^{2+}$  transient are estimated by fitting with an exponential decay function  $c \cdot \exp(-kt)$ . The mean and standard error ( $n = 50$ ) of the decay time constant,  $k$ , shows statistically significant differences across thin spine sizes;  $p^* = 4.3976 \times 10^{-4}$ ;  $p^{**} = 1.1541 \times 10^{-4}$ ;  $p^{***} = 5.4590 \times 10^{-8}$  from two-tailed  $t$ -test. The mean decay time constants as a function of volume-to-surface area ratio,  $\zeta$ , was fit with an exponential  $a \cdot \exp(-b\zeta)$ ;  $r^2 = 0.2285$  for the exponential fit. f) The mean and standard error ( $n = 50$ ) of the calculated synaptic weight change at the last time point in the simulation for all thin spine sizes, plotted against the volume-to-surface area ratio, shows statistically significant differences between all cases;  $p^* = 0.0315$ ;  $p^{**} = 1.0661 \times 10^{-5}$ ;  $p^{***} = 2.5751 \times 10^{-8}$  from two-tailed  $t$ -test.

147 Figure 3. We observe that, in thin spines, the calcium ions are concentrated in the head at 15 ms  
 148 but disperse more uniformly by 30 ms (Figure 3a and Supplemental Movie S2). We do not observe  
 149 a plug-flow like behavior as we did for filopodia-shaped spines likely because of the differences in  
 150 both shape and volume of the thin spines. Calcium dynamics in thin spines follows the expected  
 151 temporal dynamics (Figure 3b), with larger spines having larger peak calcium and increased time to  
 152 decay. Larger thin spines also have larger variance in the calcium ion concentration over time (Fig-  
 153 ure 3c). Next, we found that the maximum calcium ions per spine was significantly larger in larger  
 154 spines with statistically different values for the different sized spines. The peak calcium increased  
 155 linearly compared to spine volume-to-surface area but with a smaller slope when compared to the  
 156 filopodia-shaped spines (max peak values in filopodia-shaped spines increased three times faster  
 157 than those in thin spines), (Figure 3d). This suggests that the size dependence of calcium grows  
 158 slower in thin spines than in filopodia-shaped spines. The decay time also showed an exponential  
 159 decay in thin spines with increasing volume-to-surface area ratio (Figure 3e). The exponent was  
 160 smaller for thin spines when compared to filopodia-shaped spines (47.9 versus 23.27) suggesting  
 161 that the decay rate with respect to volume-to-surface area ratio was slower in thin spines. Finally,  
 162 the synaptic weight change showed an increase with volume-to-surface area ratio in thin spines  
 163 (Figure 3f) indicating that larger spines are capable of stronger learning outcomes.

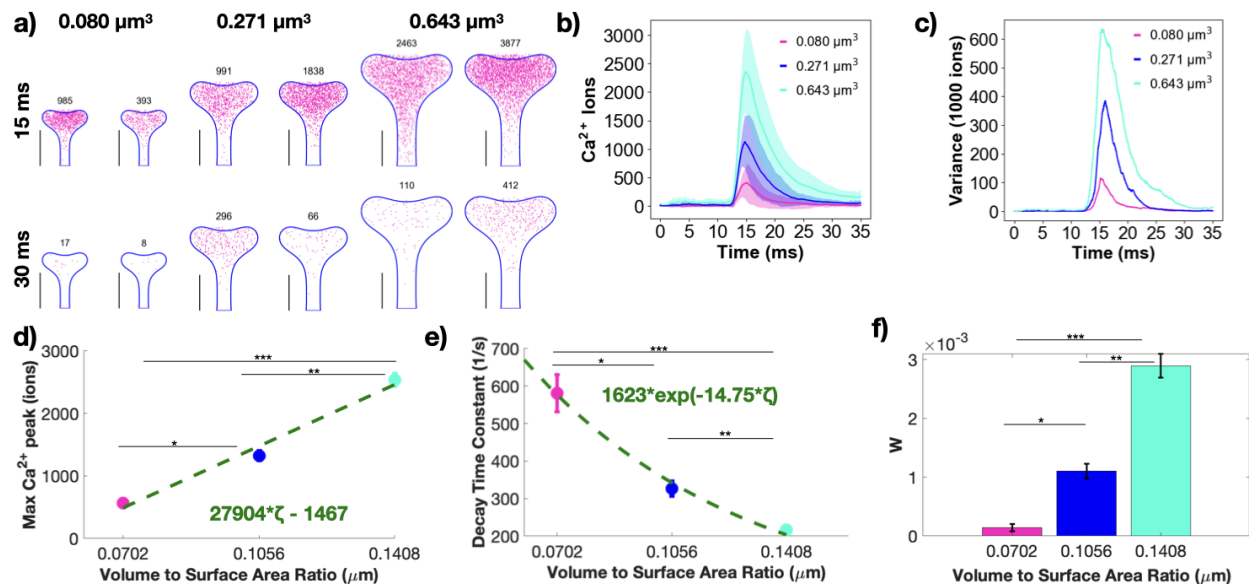

**Figure 4: Changing mushroom spine size modulates calcium dynamics and synaptic weight change.** a) Spatial plots illustrating  $\text{Ca}^{2+}$  localization at 15 and 30 ms for mushroom spines with different volumes (0.080, 0.271 and  $0.643 \mu\text{m}^3$ ). The number above each geometry corresponds to the number of  $\text{Ca}^{2+}$  in the frame. Scale bars:  $0.5 \mu\text{m}$ . b) Mean (solid) and standard deviation (shaded area) of  $\text{Ca}^{2+}$  transients across 50 simulations for each of the three mushroom spine sizes. c) Variance of  $\text{Ca}^{2+}$  over time. d) The mean and standard error ( $n=50$ ) of the peak number of  $\text{Ca}^{2+}$  in different mushroom spine sizes shows statistically significant differences;  $p^* = 4.1244 \times 10^{-13}$ ;  $p^{**} = 6.6467 \times 10^{-15}$ ;  $p^{***} = 7.8934 \times 10^{-32}$  from two-tailed  $t$ -test. We fit the trend in peak  $\text{Ca}^{2+}$  as a linear function of volume-to-surface area ratio,  $\zeta$ ;  $r^2 = 0.6655$  for the linear fit. e) The decay timescales of each  $\text{Ca}^{2+}$  transient are estimated by fitting with an exponential decay function  $c \cdot \exp(-kt)$ . The mean and standard error ( $n=50$ ) of the decay time constant,  $k$ , shows statistically significant differences across mushroom spine sizes;  $p^* = 6.8175 \times 10^{-6}$ ;  $p^{**} = 6.4075 \times 10^{-6}$ ;  $p^{***} = 1.1118 \times 10^{-10}$  from two-tailed  $t$ -test. The mean decay time constants as a function of volume-to-surface area ratio,  $\zeta$ , was fit with an exponential  $a \cdot \exp(-b\zeta)$ ;  $r^2 = 0.3223$  for the exponential fit. f) The mean and standard error ( $n=50$ ) of the calculated synaptic weight change at the last time point in the simulation for all mushroom spine sizes, plotted against the volume-to-surface area ratio, shows statistically significant differences between all cases;  $p^* = 5.1012 \times 10^{-10}$ ;  $p^{**} = 2.0097 \times 10^{-11}$ ;  $p^{***} = 2.1447 \times 10^{-23}$  from two-tailed  $t$ -test.

164 Finally, we repeated our analysis for mushroom-shaped spines of increasing volume (0.080,

165 0.271 and  $0.643 \mu\text{m}^3$ ), (Figure 4). The effect of the shape of the spines is evident in the spatial  
 166 dynamics of calcium (Figure 4a and Supplemental Movie S3). Even at 15 ms, we note that while  
 167 a vast majority of calcium ions are localized in the spine head, there is spillover of calcium into the  
 168 neck; this is particularly evident in the spines of larger volume in (Figure 4a). We further investi-  
 169 gated the role of the spine neck in both thin and mushroom spines in Figure S3 and Figure S4.

170 The effect of increases in volume, and therefore increases in volume-to-surface area on the  
 171 temporal dynamics of calcium is an increase in peak calcium (Figure 4b,d) and variance (Figure 4c),  
 172 and a decrease in the decay time constant (Figure 4e). The synaptic weight change in mushroom  
 173 spines increases with spine volume-to-surface area and is larger for these mushroom spines than  
 174 the filopodia-shaped and thin spines (Figure 4f). We observe that the peak calcium shows a lin-  
 175 ear increase with volume-to-surface area ratio with a slope that lies between the thin spines and  
 176 filopodia-shaped spines. Finally, the decay time constant decreases with spine volume-to-surface  
 177 area ratio but with a smaller exponential decay when compared to thin spines and filopodia-shaped  
 178 spines. These two results point to the following conclusions – first, an increase in spine volume  
 179 results in an increase in critical readouts of synaptic plasticity and second, the shape of the spine  
 180 alters the quantitative relationships of synaptic plasticity by allowing access to different volume-to-  
 181 surface area ratios.

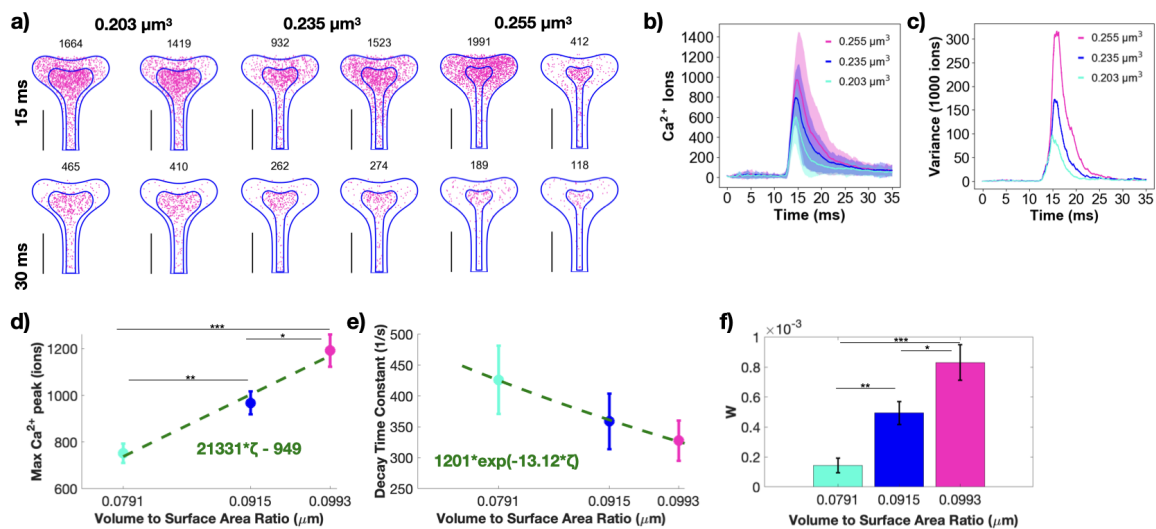

**Figure 5: Spine apparatus size modulates synaptic weight change in mushroom spines.** a) Spatial plots at 15 and 30 ms for mushroom spines with spine apparatus of different volumes (net spine volumes of 0.203, 0.235 and  $0.255 \mu\text{m}^3$ ). The numbers on top of the shape indicate the total number of calcium ions at that instant in both the spine apparatus and cytoplasm. Scale bars:  $0.5 \mu\text{m}$ . Calcium ions over time as mean and standard deviation (b) and variance (c) for all three mushroom spines with different spine apparatus sizes. Shaded regions in (b) denote standard deviation. d) Peak calcium ion number for each mushroom spine with a spine apparatus, with the mean and standard error ( $n=50$ ), show statistically significant differences;  $p^* = 0.0101$ ;  $p^{**} = 0.0010$ ;  $p^{***} = 4.0801 \times 10^{-7}$  from two-tailed  $t$ -test. We fit the trend in peak values with a linear function against the volume-to-surface area ratio;  $r^2=0.1768$  for the linear fit. e) We fit the decay dynamics of each calcium transient with  $c \cdot \exp(-kt)$  and report the decay time constant,  $k$ , as a mean and standard error ( $n = 50$ ) against volume-to-surface area ratio. The decay time constants were not statistically different. We fit the trend in decay time constants as a function of volume-to-surface area ratio with an exponential  $a \cdot \exp(-b\zeta)$ , where  $\zeta$  is the volume-to-surface area ratio;  $r^2 = 0.0166$  for the fit. f) Calculated synaptic weight change mean and standard error ( $n = 50$ ) at the last time point for all three mushroom spines with spine apparatus show statistically significant differences between all cases;  $p^* = 0.0198$ ;  $p^{**} = 2.0977 \times 10^{-4}$ ;  $p^{***} = 6.0097 \times 10^{-7}$  from two-tailed  $t$ -test.



### 182 2.3 Spine apparatus size tunes synaptic weight changes by altering the volume- 183 to-surface area relationships

184 Approximately 14 % of dendritic spines have specialized endoplasmic reticulum called spine ap-  
185 paratus which are preferentially present in larger, mature spines (22, 42, 43). Furthermore, recent  
186 studies have shown that the spine apparatus and the ER are dynamic structures in the dendrite  
187 and dendritic spines (44). Previously, we showed that the spine apparatus modulates calcium  
188 transients in deterministic models of calcium influx (22) by altering the net fluxes (23). Here, we  
189 investigate how these relationships are altered in stochastic models in mushroom spines, Figure 5  
190 (See Figure S5 for the consideration of thin spines with spine apparatus). When a spine apparatus  
191 is present in the spine head, it effectively reduces the volume of the spine cytosol and in the time  
192 frame of our consideration, acts as a calcium sink (by the action of the SERCA pumps) (45). We  
193 also varied spine apparatus size in the medium-sized mushroom spine, see Figure 5a and Table 4.  
194 Calcium transients and variance showed much smoother dynamics for the mushroom spines com-  
195 pared to the thin spines, compare Figure 5b-c versus Figure S5b-c. Peak calcium values were all  
196 statistically different for the different spine apparatus sizes and followed a linear relationship with  
197 respect to the volume-to-surface area ratio, Figure 5d. Decay time constants were fit with an ex-  
198 ponential relationship but there were no statistical differences across different spines (Figure 5e).  
199 All different spine apparatus sizes produce synaptic weight changes that are statistically different,  
200 such that increases in spine apparatus size result in smaller spine volume (and smaller volume-to-  
201 surface area ratio) and therefore produce smaller weight changes, Figure 5f. Thus, the presence  
202 of spine apparatus alters the volume-to-surface area ratio for spines and therefore tunes calcium  
203 levels and synaptic weight updates in the large mushroom spines with an inverse relationship to  
204 the spine apparatus size.

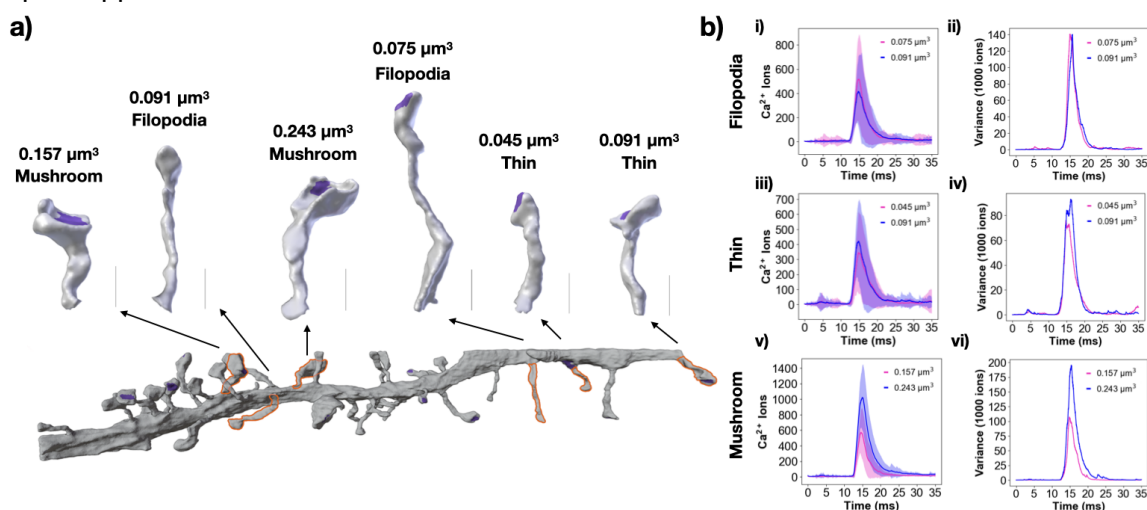

**Figure 6: Real spine geometries show size dependence for calcium dynamics** a) Spines similar to the idealized geometries were selected from a reconstructed dendrite (46). Representative filopodia-shaped spines, thin spines, and mushroom spines were selected and labelled with their volume and shape. Scale bars: 0.5  $\mu\text{m}$ . b) Calcium transients as means and standard deviation, along with variance over time for the realistic spines of different shapes; i-ii) filopodia-shaped spines, iii-iv) thin spines, and v-vi) mushroom spines. The realistic spines are labeled with their volumes.

## 2.4 Simulations in realistic geometries reveals that synaptic weight change depends on spine volume and volume-to-surface area

Thus far, we focused on idealized geometries of spines, to identify relationships between key synaptic variables and key geometric variables. We found that the peak calcium concentration, decay time constant, and synaptic weight depend on the volume-to-surface area ratio within each shape classification. Do these relationships hold for realistic geometries as well? To answer this question, we selected realistic geometries from mesh models (47) informed by electron micrographs from Wu et al (46).

Realistic spines have more complex geometries that do not fall into the exact morphological categories that we used for idealized spines. To test the significance of these variations, we selected two spines of each shape (thin, mushroom, and filopodia-shaped) and conducted simulations with the exact same parameters as the idealized simulations (Figure 6a). We chose realistic geometries that were within the range of sizes of the idealized geometries. The PSDs in the realistic spines were annotated during the segmentation process and no modifications were made to the PSD marked regions. To capture filopodia-shaped protrusions, we selected long, thin spines (with minimal differentiation between the head and neck) that had marked PSD, because we did not include dendritic filopodia in the section. Details on how to use realistic geometries in these simulation modalities can be found in the Supplemental Material.

For filopodia-shaped spines, we found that peak calcium and variance varied with volume but the variance was not appreciably different for the two spines that we used to conduct simulations (Figure 6b(i-ii), Supplemental Movie S5, Supplemental Movie S7). The realistic thin spines we chose had volumes similar to the filopodia-shaped spines and they also exhibited calcium dynamics proportional to their volume (Figure 6b(iii-iv), Supplemental Movie S8, Supplemental Movie S9). Mushroom spines had larger volumes and larger PSD areas when compared to the thin or filopodia-shaped spines (Figure 6b(v, vi), Supplemental Movie S4 and Supplemental Movie S6). Again, the calcium dynamics was proportional to the volume and showed that larger spines have higher peak calcium concentrations. Thus, the relationships of spine geometry and calcium dynamics hold in realistic geometries as well.

## 3 Discussion

Dendritic spines have been studied extensively as biochemical signaling compartments and their role in calcium sequestration has been theorized extensively (2, 4, 22, 23, 48, 49). Their unique morphological features and the classification of spine sizes and shapes with respect to function suggests possible structure-function relationships at the level of individual spines. In this work, we used stochastic modeling of calcium transients in dendritic spines of different geometries to understand how spine size and shape affect synaptic weight change. Using a stochastic simulation is important to investigate variance amongst spine shape and size as dendritic spines have small volumes and probabilistic channel dynamics. Using idealized and select realistic geometries we found that geometric properties, specifically, the volume-to-surface area affected key properties of calcium transients including peak calcium, decay time constants, and synaptic weight change. We discuss these findings in the context of different aspects of synaptic plasticity.

Our models predict despite the individual calcium transients being stochastic, there is a predictive deterministic trend that appears to carry through the different sizes and shapes of spines used in our model (Figure 7). We highlight that our goal is to demonstrate a trend in the data as opposed to building numerical functions. Although we fit the various data, we note that the  $r^2$  is often weak,

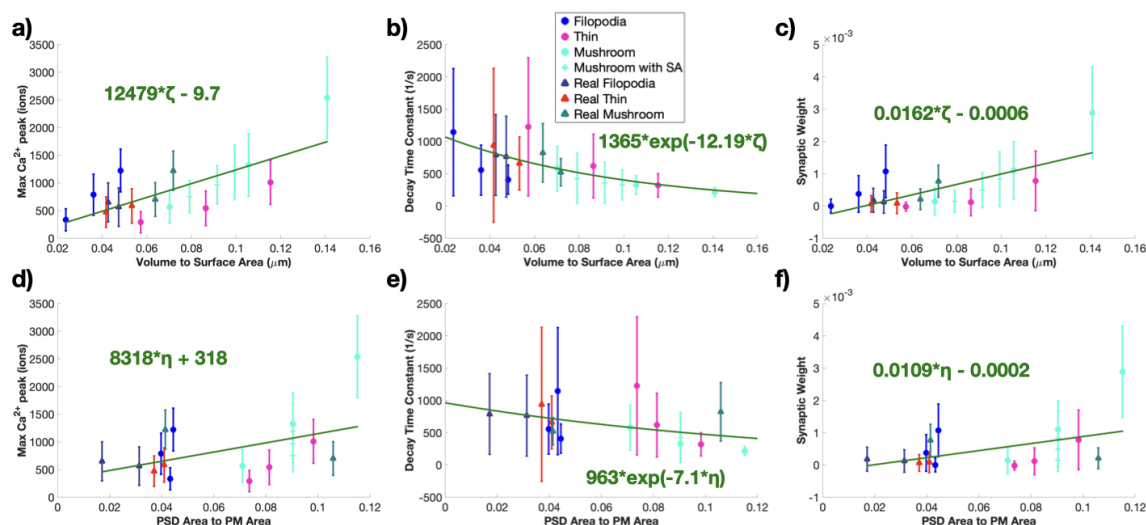

**Figure 7: Idealized and realistic spines show overall trends in peak calcium, decay rates, and synaptic weight change with respect to volume-to-surface area ratios.** a) All calcium peaks as mean and standard error ( $n=50$ ) across volume to surface area ratio show an overall increasing trend. We fit the trend in peak values with a linear function against the volume-to-surface area ratio;  $r^2 = 0.351$  for the linear fit. b) We fit the decay dynamics of each calcium transient with  $c \cdot \exp(-kt)$  and report the decay time constant,  $k$ , as a mean and standard error ( $n = 50$ ) against volume-to-surface area ratio. We fit the trend in decay time constants as a function of volume-to-surface area ratio with an exponential  $a \cdot \exp(-b\zeta)$ , where  $\zeta$  is the volume-to-surface area ratio;  $r^2 = 0.1114$  for the fit. c) Calculated synaptic weight change mean and standard error ( $n = 50$ ) at the last time point for all idealized and realistic spines shows an increasing trend. We fit the trend in synaptic weight change with a linear function against the volume-to-surface area ratio;  $r^2 = 0.2815$  for the linear fit. d) All calcium peaks as mean and standard error ( $n=50$ ) across PSD surface area to plasma membrane surface area ratio show an overall increasing trend. We fit the trend in peak values with a linear function against the PSD-to-surface area ratio;  $r^2 = 0.1441$  for the linear fit. e) We fit the decay dynamics of each calcium transient with  $c \cdot \exp(-kt)$  and report the decay time constant,  $k$ , as a mean and standard error ( $n = 50$ ) against PSD-to-surface area ratio. We fit the trend in decay time constants as a function of PSD-to-surface area ratio with an exponential  $a \cdot \exp(-b\eta)$ , where  $\eta$  is the volume-to-surface area ratio;  $r^2 = 0.0428$  for the fit. f) Calculated synaptic weight change mean and standard error ( $n = 50$ ) at the last time point for all idealized and realistic spines shows an increasing trend. We fit the trend in synaptic weight change with a linear function against the PSD-to-surface area ratio;  $r^2 = 0.1186$  for the linear fit.

249 indicative of the complexities that underlie such efforts. With this in mind, one of the advantages  
250 of our modeling approach here is that we can directly compare across the entire range of idealized  
251 and realistic geometries. By considering all the data from our models, for a total of 18 geometries  
252 with 50 simulations in each, we find that the peak calcium density is more-or-less linear with the  
253 volume-to-surface area ratio (Figure 7a). The decay time constant for calcium transients shows  
254 an exponential decay for larger volume-to-surface ratios with quite a bit of variability for smaller  
255 ratios (Figure 7b). And finally, the synaptic weight change increases as volume-to-surface area  
256 increases (Figure 7c).

257 In the idealized geometries, the PSD area is a manually-fixed proportion of the spine volume  
258 but realistic geometries do not have this artificial constraint. Therefore, we redid our analysis using  
259 PSD area-to-surface area ratios (PSD to Plasma Membrane (PM) ratio). We still found the same  
260 relationships overall (Figure 7d-f) but this time with clustering of data around some ratios. This  
261 indicates that the PSD area is an important additional degree of freedom for synaptic weight change  
262 that must be considered for interpretation of geometric features and using realistic geometries with  
263 boundary markings allows us to investigate this. It is important to note that there is a lot more  
264 variability in the smaller volume-to-surface area ratios suggesting the response of smaller spines  
265 may be more erratic than larger spines. This feature can work as a double-edged sword – it may  
266 provide an advantage during the development of spines or be an disadvantage in the case of loss  
267 of spines (50, 51).

268 Finally, we interpret our predictions in the context of spine shapes. Filopodia are prevalent dur-  
269 ing early synaptogenesis and can transition into dendritic spines based on synaptic activity (37).  
270 Additionally, various disease states produce modified dendritic spines that appear more like filopo-  
271 dia (52). The lack of significant weight changes for the smallest filopodia-shaped spine indicates  
272 that there is a volume threshold at which filopodia receive enough stimulus trigger synaptic weight  
273 change and transition towards more stable, mature dendritic spines. Importantly, the early synaptic  
274 weight changes emphasize how the increase in spine volume changes the weight outcome from  
275 LTD to LTP. This increase in synaptic weight emphasizes how an increase in spine size can push  
276 a thin spine to transition into a stable, larger mushroom spine.

277 The difference in peak calcium level, decay dynamics, and synaptic weight changes as dif-  
278 ferent spine shapes are scanned across different sizes can also provide insight on spine shape  
279 transitions during development and maturation. Filopodia-shaped spines have larger increases in  
280 peak calcium levels and synaptic weight updates and faster decreases in decay time constants as  
281 their volume-to-surface area ratios and volumes increase, compared to both thin and mushroom  
282 spines; Figure 2, Figure 3, and Figure 4. This suggests that filopodia can very quickly alter their  
283 calcium levels, and therefore are well-suited for initially identifying possible synaptic partners and  
284 subsequently directing resources to those filopodia that are good candidates to transition to den-  
285 dritic spines (53). Once filopodia are established, their linear calcium increase with volume might  
286 be unsustainable and might lead to the reduced levels of increase for thin spines of comparable  
287 volume-to-surface area (and volume). This suggests that larger stimuli might be necessary to push  
288 thin spines towards more excitation, perhaps prevent excessive numbers of thin spines from matur-  
289 ing and leading to resource depletion and excess neural connectivity (54). Mushroom spines once  
290 again show more of an increase in synaptic weight as they increase in volume-to-surface area ratio  
291 (and volume) but at volumes shifted from the filopodia-shaped spines, perhaps highlighting their  
292 role as key communication hubs (54). The volume shift seen in mushroom spines versus filopodia-  
293 shaped spines might serve to limit the number of mature, highly excitable dendritic spines as both  
294 a key neuronal network and resource regulation feature. When the spine apparatus acts as a sink,  
295 its presence dampens synaptic weight changes in mushroom spines, potentially acting to stabilize  
296 the spine from future changes as suggested by others (41, 55).

297 We note that our study is only a small piece of the puzzle with respect to synaptic plasticity.  
298 For instance, whether one should use total number of calcium ions or use calcium concentration  
299 in evaluating synaptic weight change requires additional exploration. For instance, we find that  
300 when calcium results are converted from total ions to average concentration along with the phe-  
301 nomenological synaptic weight equations, we get different trends in synaptic weight update results,  
302 Figure S7. However, converting our previous results (22) into total ions shows the same trends  
303 for max  $\text{Ca}^{2+}$  peak and decay time constants as this current study, Figure S6. Thus, a simple unit  
304 issue can lead to conflicting results in spatial models and indicates that we need further discussion  
305 and investigation on the structure of phenomenological equations for synaptic weight to understand  
306 which factors of calcium dynamics matter and to what degree. An additional limitation of this study  
307 is the usage of traditional p-values for statistical analysis of the data (see Figure S8 for details on  
308 h and p values), since the statistics field has suggested moving away from null-hypothesis signifi-  
309 cance testing (56). We also note that our current focus is on very early events and these models  
310 must be extended to longer time scale events to explore the biochemical and geometric interplay  
311 for downstream signaling (57–60).

312 In summary, our computational models using idealized and realistic geometries of dendritic  
313 spines have identified potential relationships between spine geometry and synaptic weight change  
314 that emerge despite the inherent stochasticity of calcium transients. The advances in computa-  
315 tional modeling and techniques have set the stage for a detailed exploration of biophysical pro-  
316 cesses in dendritic spines (57, 61, 62). Such efforts are critical for identifying emergent properties  
317 of systems behavior and also eliminating hypotheses that are physically infeasible (63, 64). Mod-  
318 els such as this and others can set the stage for investigating longer time scale events in spines  
319 including the downstream effectors of calcium (16, 58, 65, 66), and actin remodeling for structural  
320 plasticity (67, 68).

## 321 **4 Methods**

322 We developed a stochastic reaction diffusion model in MCell (33). The reactions are obtained from  
323 Bartol et al. (24) and Bell et al. (22) and are discussed in detail below.

### 324 **4.1 Simulation Information and Parameters**

325 Simulations were run for a total simulation time of 35 ms with a 500 ns time step. Each geometry  
326 is simulated in MCell over 50 distinct seeds to generate an appropriate sample size of results, and  
327 we use a write-out frequency of once per iteration to allow for reproducibility of results. At the  
328 beginning of each simulation, membrane proteins are distributed randomly over specified regions  
329 of the spine geometry surface area according to an assigned count or concentration. The reaction  
330 rates for all components in the model system were adjusted in (24) to reflect a system temperature  
331 between 34 °C and 37 °C.

### 332 **4.2 A Note About the Treatment of Extracellular Calcium**

333 Extracellular calcium was not explicitly modeled for ease of computational tractability. We assumed  
334 a constant extracellular calcium concentration that is negligibly impacted by the calcium influx to  
335 and efflux from the spine cytoplasm. The dynamics of  $\text{Ca}^{2+}$  ions are explicitly modeled once they  
336 enter the cell through channels located on the PM, and cease to be explicitly represented once  
337 they are pumped out of the cell.

### 338 4.3 Dynamics of calcium ions in the spine volume

339 We summarize the main reactions for  $\text{Ca}^{2+}$  ions in the volume. The values for the reaction rates  
 340 and other important model parameters are located in Table 1. In the spine volume, calcium decay  
 341 took the form given below where  $k_d$  sets a decay time scale,

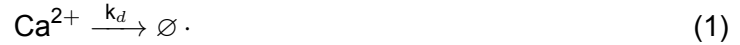

342 The value of  $k_d$  is taken as  $50 \text{ s}^{-1}$  based on (22). We note that this is significantly smaller than the  
 343 decay rate constant determined in the results. This is expected as this cytosolic calcium decay is  
 344 just one means of calcium clearing from the cytoplasm, along with the various pumps, and mobile  
 345 and fixed buffers.

346 In the volume, calcium binds with fixed and mobile buffers in the cytoplasm, modeled here  
 347 generically with  $B_m$  to represent mobile calcium buffers, and  $B_f$  to represent fixed buffers. Calcium-  
 348 buffer binding is modeled in MCell with the reactions

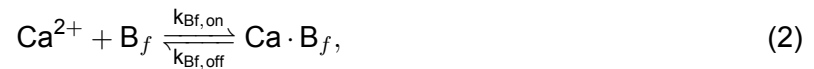

349 and

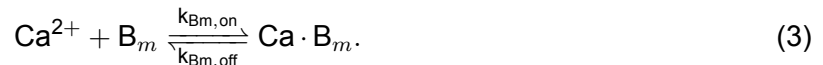

350 Reaction rates for the mobile and fixed buffers are found in Table 1.

**Table 1: Parameters used in the model for volume.**

| Variable                               | Value              | Units                       | Reference |
|----------------------------------------|--------------------|-----------------------------|-----------|
| Init. $[\text{Ca}^{2+}]_{\text{cyto}}$ | $1 \times 10^{-7}$ | M                           | (24, 69)  |
| Init. $[\text{Ca}^{2+}]_{\text{ER}}$   | $6 \times 10^{-5}$ | M                           | (24)      |
| Init. $[\text{Ca}^{2+}]_{\text{ECS}}$  | 2                  | mM                          | (70)      |
| $k_d$                                  | 50                 | $\text{s}^{-1}$             | (22)      |
| Init. $[B_f]$                          | $2 \times 10^{-5}$ | M                           | (71)      |
| Init. $[B_m]$                          | 4791               | molecule $\mu\text{m}^{-2}$ | (24)      |

### 351 4.4 Plasma Membrane

352 The primary influx of calcium through the plasma membrane occurs through NMDARs and VSCCs,  
 353 and calcium is pumped out of the cell via two kinds of pumps: PMCA, and NCX. In this model,  
 354 NMDARs are both voltage and glutamate dependent and are localized to the PSD region. VSCCs  
 355 are voltage dependent and located throughout the plasma membrane surface. PMCA and NCX  
 356 are calcium-dependent pumps and are also located throughout the plasma membrane surface.

#### 357 4.4.1 NMDA receptors

358 NMDAR are localized to the PSD area with areal density  $150 \text{ molecule } \mu\text{m}^{-2}$  (24). The activation of  
 359 NMDAR is modeled with an asymmetric trapping block kinetic scheme as proposed by Ref. (72).  
 360 The activation of NMDAR is dependent on the diffusion of glutamate through the synaptic cleft,

361 and its binding to inactive receptors. In this study, a surface identical to the top of the spine head is  
362 displaced 2  $\mu\text{m}$  above the head, approximating the synaptic cleft. At time  $t = 0$  in each simulation,  
363 500 molecules of glutamate are released at the center of this synaptic cleft at the beginning of  
364 simulation, and subsequently diffuse through the space at a rate of  $2.2 \times 10^{-6} \text{ cm}^2 \text{ s}^{-1}$ , where they  
365 bind to membrane-bound proteins. On the postsynaptic membrane, NMDARs compete with the  
366 glutamate receptor AMPAR for glutamate; thus, AMPARs are also included in the simulation to  
367 model this competition but they do not play a role in calcium influx. AMPAR is also localized to  
368 the PSD area. The binding of glutamate to AMPAR is modeled according to the kinetic scheme  
369 proposed by Ref. (73).

370 Calcium flux through open NMDARs is modeled in MCell with a simple monomolecular reaction.

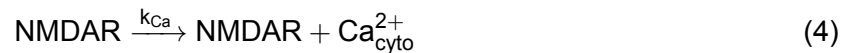

371 where the rate of calcium influx is given by

$$k_{\text{Ca}}(V) = \gamma_{\text{NMDAR}} \cdot \frac{V - V_r}{2 \cdot 1.6 \times 10^{-19}} \quad (5)$$

372  $V$  is the membrane potential, and  $V_r$  is the reversal potential for NMDAR. The parameters for the  
373 NMDAR reactions are the same as given in (72) and the parameters for the AMPAR reactions are  
374 the same as given in Ref. (73).

#### 375 4.4.2 Calcium influx through voltage-sensitive calcium channels

376 The influx of  $\text{Ca}^{2+}$  through an open VSCC is given by the reaction:

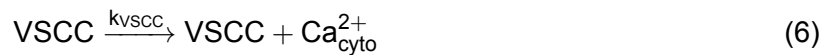

377 where the rate of calcium influx is given by

$$k_{\text{VSCC}} = \frac{\gamma V(t) N_A [0.393 - \exp(\frac{-V(t)}{80.36})]}{2F [1 - \exp(\frac{V(t)}{80.36})]} \quad (7)$$

378 The influx of  $\text{Ca}^{2+}$  through VSCCs is also dependent on the activation kinetics of VSCCs. The  
379 initial conditions for all the VSCCs is the closed state, and the activation of the channels is modeled  
380 here with a five state kinetic scheme as used in Ref. (24). The parameters for  $\text{Ca}^{2+}$  influx through  
381 VSCCs are the same as in (24). We included a VSCCs density of 2 molecule  $\mu\text{m}^{-2}$ .

#### 382 4.4.3 Voltage calculations in the model

383 Since the transmembrane potential is time-varying and the rate constants for NMDAR and VSCC  
384 are voltage-dependent, the values of these rate constants at each simulation step were pre-computed  
385 and passed into MCell. The voltage stimulus representing a single EPSP starting at time  $t = 0$ , fol-  
386 lowed by a single BPAP occurring at an offset of 10 ms was obtained from Ref. (24). Note that this  
387 time offset is within the typical window for Spike-Timing Dependent Plasticity (STDP) to inducing  
388 LTP (24, 74).

#### 389 4.4.4 PMCA and NCX

390 PMCA and NCX are located on the plasma membrane with areal density 998 molecule  $\mu\text{m}^{-2}$  and  
391 142 molecule  $\mu\text{m}^{-2}$  respectively (24), forcing an efflux of calcium out of the cell. These pumps are  
392 modeled using the set of elementary reactions and reaction rates from Ref. (24).

#### 393 4.4.5 Spine Apparatus

394 Calcium enters the spine apparatus via SERCA pumps, and exits by leakage. SERCA pumps are  
 395 calcium dependent and located throughout the spine apparatus membrane at  $1000 \text{ molecule } \mu\text{m}^{-2}$ .  
 396 SERCA influx is modeled as a series of elementary reactions with rates from Ref. (24). Calcium  
 397 leakage from the spine apparatus into the cytosol is modeled by the reaction

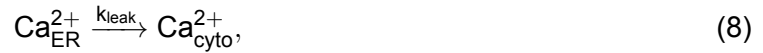

398 where  $k_{\text{leak}}$  is  $0.1608 \text{ s}^{-1}$  from Ref. (22).

#### 399 4.5 Synaptic weight change

400 We considered the effects of a single instance of spine activation on cytosolic calcium dynamics  
 401 and subsequent synaptic weight change. Therefore, we can interpret this synaptic weight change  
 402 as an early indicator of longer synaptic weight changes. We modeled changes in synaptic weight,  
 403  $w$ , due to cytosolic calcium as a phenomenological relationship, inspired by (7, 55). Synaptic  
 404 weight change is given by

$$\frac{dw}{dt} = \frac{\Omega_w - w}{\tau_w}, \quad (9)$$

405 where  $\tau_w$  is a learning rate given as

$$\tau_w = k_1 + \frac{k_2}{k_3 + 2\text{Ca}_{\text{cyto}}^{2+}(t)/(\theta_D + \theta_P)}, \quad (10)$$

406 and  $\Omega_w$  describes calcium dependence in the regimes of LTP and LTD as

$$\Omega_w = \frac{1}{1 + \exp(-\beta_P(\text{Ca}_{\text{cyto}}^{2+}(t) - \theta_P))} - \frac{0.5}{1 + \exp(-\beta_D(\text{Ca}_{\text{cyto}}^{2+}(t) - \theta_D))}. \quad (11)$$

407 Cytosolic calcium,  $\text{Ca}_{\text{cyto}}^{2+}(t)$ , is input as total ions in the spine in the above equation. The differential  
 408 equation for synaptic weight,  $w$ , is solved in MATLAB 2018b using ode23s, with an initial synaptic  
 409 weight value of 0 so synaptic weight change and synaptic weight are the same value for this single  
 410 stimulation event. Synaptic weight parameters are given in Table 2.

411 Because we are working with a stochastic model and are considering  $\text{Ca}^{2+}$  in terms of ions,  
 412 we converted the parameters in the synaptic weight equations from units involving concentration  
 413 to units of molecules, based on average spine volumes and realistic numbers of calcium ions in  
 414 dendritic spines. It is important to note that using total  $\text{Ca}^{2+}$  ions is a global view of the dendritic  
 415 spine while concentration can be considered as more of a local measurement. As mentioned,  
 416 this synaptic weight change is a phenomenological relationship between  $\text{Ca}^{2+}$  and synaptic weight  
 417 which captures the concept of synaptic strength change, and it remains unclear if using ions ver-  
 418 sus concentration is a better approach for predicting this change. We converted our results into  
 419 average concentrations by dividing the calcium transients by the respective spine volume, convert-  
 420 ing our synaptic weight parameters into units of concentration, and rerunning our synaptic weight  
 421 calculations, Figure S7. Further investigation is required to understand the considerations behind  
 422 these different approaches.



**Table 2: Parameters for Synaptic Weight.**

| Variable   | Value              | Units                  | Reference |
|------------|--------------------|------------------------|-----------|
| Init. $w$  | 0                  | –                      | (55)      |
| $k_1$      | 1                  | s                      | (55)      |
| $k_2$      | 10                 | s                      | (55)      |
| $k_3$      | $1 \times 10^{-3}$ | –                      | (55)      |
| $\theta_D$ | 100                | molecule               | *(7, 55)  |
| $\theta_P$ | 400                | molecule               | *(7, 55)  |
| $\beta_D$  | 0.2977             | molecule <sup>-1</sup> | *(7, 55)  |
| $\beta_P$  | 0.2977             | molecule <sup>-1</sup> | *(7, 55)  |

\* These parameters were converted from concentration units with adjustments for consistency.

## 423 4.6 MATLAB Analysis of Ca<sup>2+</sup> transients

424 We used MATLAB version 2018b to analyze the max Ca<sup>2+</sup> peak and decay time constants for the  
425 stochastic Ca<sup>2+</sup> results. For each realization of the Ca<sup>2+</sup> transient, we used the `max()` function to  
426 find the peak Ca<sup>2+</sup> value and corresponding time. We fit the transient after the peak using the `fit()`  
427 function set to ‘exp1’. The parameters from each fit, corresponding to a realization from a random  
428 seed, and statistics such as the mean and standard deviations are computed. The standard error  
429 of the mean was found by dividing the standard deviation by the square root of the number of  
430 individual trials, in this case 50 trials.

## 431 4.7 Statistical Analysis

432 Statistical significance was determined using a two-tailed two-sample  $t$ -test assuming equal means  
433 and variance (`ttest2()` function) in MATLAB version 2018b with a significance cutoff at  $p = 0.05$ .  
434 Statistical comparisons were made between the distributions of observables yielded by the 50 sim-  
435 ulations of the compared experimental conditions. Trends in the stochastic results data were fit  
436 using all 50 seeds for each of the simulations being considered in the fit. The reported trend lines  
437 are estimated using the data from all 50 seeds, as opposed to fitting to the means only. Linear fits  
438 and exponential fits were computed in MATLAB using the functions `fitlm()` and `fit()`, respec-  
439 tively. We highlight that we are using the classical approach of null-hypothesis significance testing,  
440  $p$ -values, and statistically significant verbiage, which has been questioned as perilous and over-  
441 simplistic (56). We have provided the  $p$ -values for each result comparison for closer consideration,  
442 Figure S8. The linear and exponential trend lines shown have a range of  $r^2$  values and are used  
443 to show general trends. We emphasize however that in some plots we are fitting to either very few  
444 data points or a small domain. Therefore, we reiterate that these factors limit the interpretation of  
445 the quantitative nature of the fits.

## 446 **5 Geometries**

447 Idealized, axisymmetric geometries are used to represent the structure of dendritic spines in this  
448 study. Three general spine shapes are represented – thin, mushroom, and filopodia-shaped – and  
449 each shape is further varied in size and, for the thin and mushroom spines, neck radius.

### 450 **5.1 Geometry generation**

451 The geometries were generated from 2-dimensional ideal spine profiles obtained from Ref. (36)  
452 consisting of a series of points  $(r, z)$  which form the outline of the respective geometry's rotational  
453 cross-section. Using Netgen/NGSolve version 6.2 (75), we revolved these profiles about the z-axis  
454 to yield a rotationally-symmetric 3-dimensional spine geometry, Figure 8. In all spine geometries,  
455 a circular PSD was centered at the top of the spine head. The PSD area was set as a function of  
456 spine volume according to the relationship observed in Ref. (76).

### 457 **5.2 Size and neck variations**

458 To further explore the effects of geometric variations on calcium transients and stochasticity, and  
459 to facilitate the comparison of spine geometries of similar volumes and different shapes, the base  
460 geometries of all three shapes are scaled to two additional volumes beyond the base shapes from  
461 (36). The additional versions of the thin spine, initially smaller than the other spine shapes, are  
462 scaled such that their length measurements are 1.5 and 2 times their original values, resulting in  
463 volumes 3.375 and 8 times that of the initial thin spine, respectively. The base mushroom spine,  
464 intermediate in volume, is scaled to 0.66 and 1.33 times its original size, resulting in volumes 0.287  
465 and 2.353 times their original value, respectively. And the base filopodia-shaped spine, initially the  
466 largest in volume, is scaled to 0.5 and 0.75 times its original size, resulting in volumes 0.125 and  
467 0.422 times the original volume. This scheme ultimately results in three different sizes for each  
468 spine shape, spanning a similar range of volumes.

469 The neck radius of the thin and mushroom spines is also varied, with neck length modified as  
470 well to preserve spine volume. To create the different spine sizes, the 2-dimensional spine profiles  
471 are dilated about the origin by a certain scale factor, and the resultant image is rotated about  
472 its vertical axis using Netgen/NGSolve to produce a scaled-up or scaled-down three-dimensional  
473 geometry. In the thin and mushroom 2-dimensional profiles, the x-values of points along the spine  
474 neck are scaled by a certain coefficient, and the length of the neck is then scaled by the squared  
475 inverse of the coefficient in order to maintain an approximately constant volume. A list of all spine  
476 geometries used, and their respective geometric measures, is found in Table 3.

### 477 **5.3 Spine Apparatus**

478 Some dendritic spines are observed to have a spine apparatus denoted as SpApp, an extension of  
479 the smooth endoplasmic reticulum, extending from the dendrite into the neck and head of the spine  
480 (43). In this study, the effects of the presence of the SpApp on calcium transients and stochasticity  
481 are investigated; to achieve this, the thin and mushroom spine geometries are further modified  
482 with the addition of a spine apparatus of varying sizes. For both spine shapes, the control-sized  
483 SpApp geometry is constructed by scaling down the original spine geometry and extending the  
484 spine apparatus neck, such that the SpApp occupies approximately 10 % of the spine volume and  
485 extends to the base of the spine. SpApp size is then varied by scaling the SpApp geometry up and  
486 down, changing the neck length such that the SpApp base coincides with the spine base. SpApp

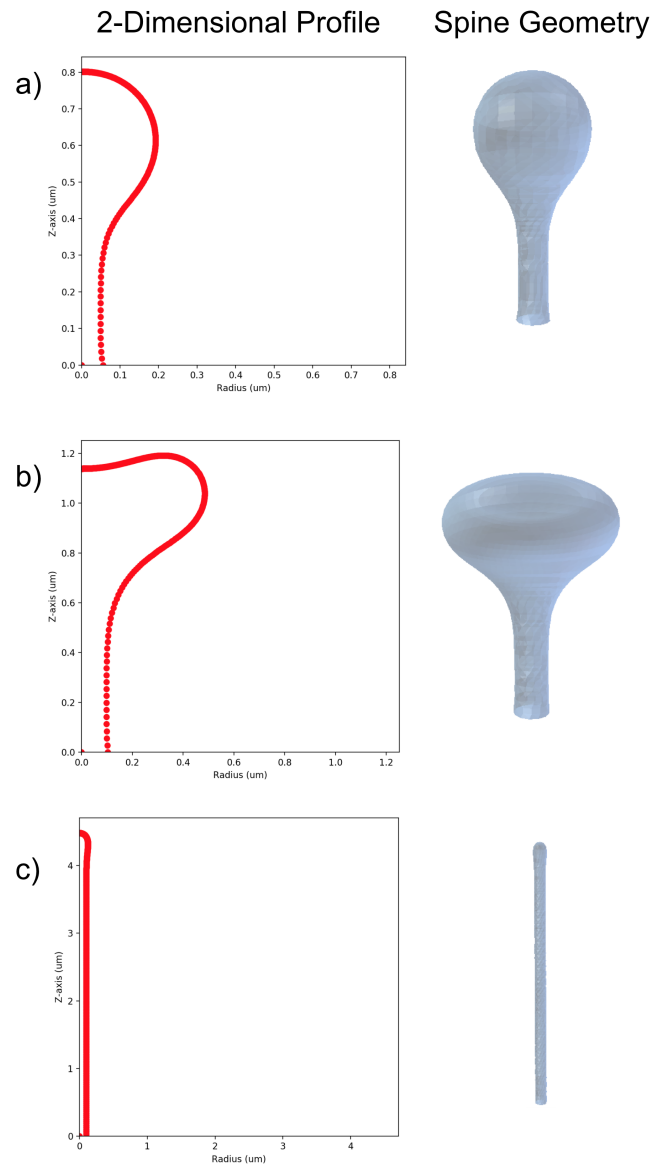

**Figure 8:** The 2-dimensional spine profiles and the resultant rotationally-symmetric spine geometries for a) thin spines, b) mushroom spines, and c) filopodia.

487 is not added to the filopodia-shaped geometry, as the spine apparatus is not generally found to be  
 488 present in such spine shapes (43). The SpApp-containing geometries are also listed in Table 4.

**Table 3:** A list of all geometric variations.

| Geometry                | Scale | Volume ( $\mu\text{m}^3$ ) | Surface Area ( $\mu\text{m}^2$ ) | Neck Radius ( $\mu\text{m}$ ) | PSD Area ( $\mu\text{m}^2$ ) |
|-------------------------|-------|----------------------------|----------------------------------|-------------------------------|------------------------------|
| <b>Thin</b>             |       |                            |                                  |                               |                              |
| small                   | x1    | 0.035                      | 0.611                            | 0.06                          | 0.045                        |
| thin neck               | x1    | 0.034                      | 0.653                            | 0.04                          | 0.045                        |
| thick neck              | x1    | 0.035                      | 0.590                            | 0.07                          | 0.045                        |
| medium                  | x1.5  | 0.119                      | 1.378                            | 0.08                          | 0.112                        |
| large                   | x2    | 0.283                      | 2.453                            | 0.11                          | 0.241                        |
| <b>Mushroom</b>         |       |                            |                                  |                               |                              |
| small                   | x0.67 | 0.080                      | 1.140                            | 0.07                          | 0.081                        |
| medium                  | x1    | 0.271                      | 2.567                            | 0.10                          | 0.232                        |
| thin neck               | x1    | 0.270                      | 2.689                            | 0.08                          | 0.232                        |
| thick neck              | x1    | 0.272                      | 2.507                            | 0.13                          | 0.232                        |
| large                   | x1.33 | 0.643                      | 4.568                            | 0.13                          | 0.526                        |
| <b>filopodia-shaped</b> |       |                            |                                  |                               |                              |
| small                   | x0.5  | 0.017                      | 0.717                            | 0.05                          | 0.031                        |
| medium                  | x0.75 | 0.058                      | 1.609                            | 0.08                          | 0.064                        |
| large                   | x1    | 0.138                      | 2.860                            | 0.10                          | 0.127                        |

**Table 4:** A list of spine apparatus variations.

| Geometry | SA size | SA Volume ( $\mu\text{m}^3$ ) | Cytoplasm Volume ( $\mu\text{m}^3$ ) |
|----------|---------|-------------------------------|--------------------------------------|
| Thin     | Small   | 0.00211                       | 0.033                                |
|          | Medium  | 0.00465                       | 0.030                                |
|          | Large   | 0.00867                       | 0.026                                |
| Mushroom | Small   | 0.0160                        | 0.255                                |
|          | Medium  | 0.0358                        | 0.235                                |
|          | Large   | 0.0676                        | 0.203                                |

## 489 5.4 Realistic Geometries

490 Realistic geometries were chosen from among those on the full dendrite geometry generated in  
 491 Ref. (47). Briefly, the geometric meshes were generated from electron micrographs in Wu et al.  
 492 (46) using GAMer 2 (77). Individual spines with labeled PSD and volumes similar to the idealized  
 493 geometries were selected from the realistic dendritic branch.

**Table 5:** Table of values for realistic geometries.

| Spine Number | Shape     | Volume ( $\mu\text{m}^3$ ) | Surface Area ( $\mu\text{m}^2$ ) | PSD Area ( $\mu\text{m}^2$ ) |
|--------------|-----------|----------------------------|----------------------------------|------------------------------|
| 13           | Mushroom  | 0.157                      | 2.457                            | 0.26                         |
| 17           | Filopodia | 0.091                      | 1.916                            | 0.06                         |
| 18           | Mushroom  | 0.243                      | 3.383                            | 0.14                         |
| 37           | Filopodia | 0.075                      | 1.756                            | 0.03                         |
| 39           | Thin      | 0.045                      | 1.078                            | 0.04                         |
| 41           | Thin      | 0.091                      | 1.710                            | 0.07                         |

## 494 **6 Acknowledgements**

495 This work was supported by a National Defense Science and Engineering Graduate (NDSEG)  
496 Fellowship to M.K.B., a Hartwell Foundation Postdoctoral Fellowship to C.T.L., and Air Force Office  
497 of Scientific Research FA9550-18-1-0051 to P.R.. MCell development is supported by the NIGMS-  
498 funded (P41-GM103712) National Center for Multiscale Modeling of Biological Systems (MMBioS).

# Supplemental Material for Stochastic simulations reveal that dendritic spine morphology regulates synaptic plasticity in a deterministic manner

M. V. Holst\*, M. K. Bell\*, C. T. Lee, and P. Rangamani\*\*

Department of Mechanical and Aerospace Engineering,  
University of California San Diego, La Jolla CA 92093.

\*Both these authors contributed equally

\*\*To whom correspondence must be addressed: prangamani@ucsd.edu

## S1 Additional simulation results

### S1.1 Simulation results versus other geometric parameters show various trends

We plot max  $\text{Ca}^{2+}$  peak, decay time constant, and synaptic weight against volume for all size variations of filopodia-shaped spines, thin spines, mushroom spines, and mushroom spines with spine apparatus Figure S1. We see similar trends across volume as we observe across volume-to-surface area ratio. We plot all results together on the same plot for max  $\text{Ca}^{2+}$  peak, decay time constant, and synaptic weight against volume-to-PSD area and volume, Figure S2. We see almost no dependence on volume-to-PSD area for any of the readouts. We see similar trend versus volume as we see in volume-to-surface area ratio.

### S1.2 Spine neck size shows differences in the large mushroom spines but not the smaller thin spines

The spine neck has long been discussed as a key parameter governing calcium signaling within dendritic spines (25). We also explored the effects of varying spine length and radius, while preserving spine volume. We first varied the spine neck on thin spines of the control volume, Figure S3a. We saw that while the calcium transients have considerable overlap, the thin-necked spine shows significant variance at later time points compared to the other spines, Figure S3b-c. We see no statistically significant differences between peak calcium values and only decay differences between the thinnest and thickest necks, Figure S3d-e. Synaptic weight changes for the thin spines with different neck geometries showed no significant differences but were trended towards negative weight changes for thicker necks, Figure S3f. We next explored mushroom spines with thinner or thicker neck geometries but with the same volume as the mushroom control spine, Figure S4a. While the mean of the calcium transients appeared quite close, there was significant difference in variance for the mushroom spine with the thick neck, Figure S4b-c. We saw differences in peak calcium only between the thinnest and thickest of the mushroom neck cases, and no significant difference in decay time constant, Figure S4d-e. Synaptic weight calculations show that presence of the thinnest versus thickest neck on a mushroom spine does lead to statistically significant differences in synaptic weight updates, Fig. S4f. This indicates that spine neck morphology might have more implications for these larger mushroom spines, compared to the smaller thin spines.

### 536 **S1.3 The presence of spine apparatus in thin spines cause no clear trend in synap-** 537 **tic weight update**

538 We vary the size of spine apparatus in thin control spines with the spine apparatus acting as a cal-  
539 cium sink with SERCA pumps, Figure S5a. We see that the presence of spine apparatus makes  
540 the calcium transient response more complex with a double peak visible in the variance for thin  
541 spines, Figure S5b-c. While we can fit the peak calcium values and decay time constant trends  
542 against both volume (Figure S5d,e) and volume-to-surface area ratio (Figure S5g,h), spine appa-  
543 ratus presence shows no clear trend in synaptic weight change for thin spines and the differences  
544 were not statistically significant, Figure S5f.

### 545 **S1.4 Our previous deterministic results match the qualitative trends seen in these** 546 **results**

547 We previously published a deterministic reaction diffusion model of calcium dynamics in dendritic  
548 spines of different morphologies (22). We found trends in the peak calcium concentration over  
549 spine volumes in that work and wanted to directly compare those results to our findings in this work.  
550 Using the results from (22), we integrate calcium concentration over the spine volume at each time  
551 point and find the peak calcium in ions and fit the decay dynamics of the calcium transient with an  
552 exponential decay function,  $c \cdot \exp(-kt)$ . We compare the peaks and decay time constants over  
553 both volume and volume-to-surface area ratio, and find the same qualitative trends as our findings  
554 in this currents work, Figure S6.

### 555 **S1.5 Synaptic weight changes depends on calculations with ions versus concen-** 556 **tration**

557 Synaptic weight update equations are typically phenomenological relationships based on  $\text{Ca}^{2+}$ .  
558 Historically, many mathematical models considering synaptic weight changes have considered  
559 synaptic weight changes in terms of concentration (6, 7, 55). In this model, we consider  $\text{Ca}^{2+}$  in  
560 terms of  $\text{Ca}^{2+}$  ions. We want to consider if the use of ions versus concentration influences the  
561 synaptic weight update results. We converted the synaptic weight equations by converting the  
562 parameters from units involving molecules to concentration by dividing by the average spine vol-  
563 ume ( $0.09 \mu\text{m}^3$ ) and converting to  $\mu\text{M}$ . We convert all the  $\text{Ca}^{2+}$  transients to  $\mu\text{M}$  by dividing by  
564 each respective spine geometry volume and modifying units. We plot the synaptic weight change  
565 at 35 ms for all simulations when considering ions versus concentration Figure S7. We see that  
566 synaptic weight change does change between using ions versus concentration because the con-  
567 centration also considers the volume of the spines. Using concentration leads to a decreasing  
568 trend in synaptic weight with increasing volume which is the opposite of the trend seen using ions.  
569 We do however still see protrusion-type specific trends within the overall dynamics. There are  
570 several considerations to make during this comparison. First, as mentioned, the synaptic weight  
571 equations used are phenomenological relationships between  $\text{Ca}^{2+}$  and the concept of synaptic  
572 weight which captures the idea of synaptic strengthening which would actually occur through the  
573 insertion of receptors, such as AMPAR, and potentially spine volume increase. It remains unclear  
574 if total ion count, which is a global consideration of the whole spine, or  $\text{Ca}^{2+}$  concentration, which  
575 considers the local environment, is the correct value to consider for synaptic weight calculations.  
576 Furthermore, we used average concentration in Figure S7c-d) but dendritic spines are known to  
577 have signaling nanodomains, so it could be possible that it would be more accurate to consider  
578 peak concentration instead of average concentration for this calculation. Additionally, it is possi-

579 ble that the thresholds for LTP versus LTD need to be modified for considering a global reading,  
 580 such as total ions in the spine, versus a local measurement, such as local concentration. Should  
 581 synaptic weight change depend on the total amount of  $\text{Ca}^{2+}$  influx or the local environment within  
 582 the spine? This is an ongoing consideration that needs further analysis and discussion.

### 583 S1.6 Two-tailed $t$ -test results for all stochastic simulations

584 We conduct two-tailed  $t$ -test calculations between all stochastic simulations for both idealized and  
 585 real geometries for max  $\text{Ca}^{2+}$  peak, decay time constant, and synaptic weight change. We display  
 586 both the  $h$  and  $p$  value for each comparison, Figure S8. We use a  $p$  threshold of 0.05 to determine  
 587 the binary  $h$  value. A  $p$  value smaller than 0.05 indicates that the two results are statistically different  
 588 and produce a  $h$ -value of 1. Reversely, a  $p$  value larger than 0.05 indicates that the two results are  
 589 not statistically different and produce a  $h$ -value of 0.  $p$ -values have been truncated at two decimal  
 590 points.

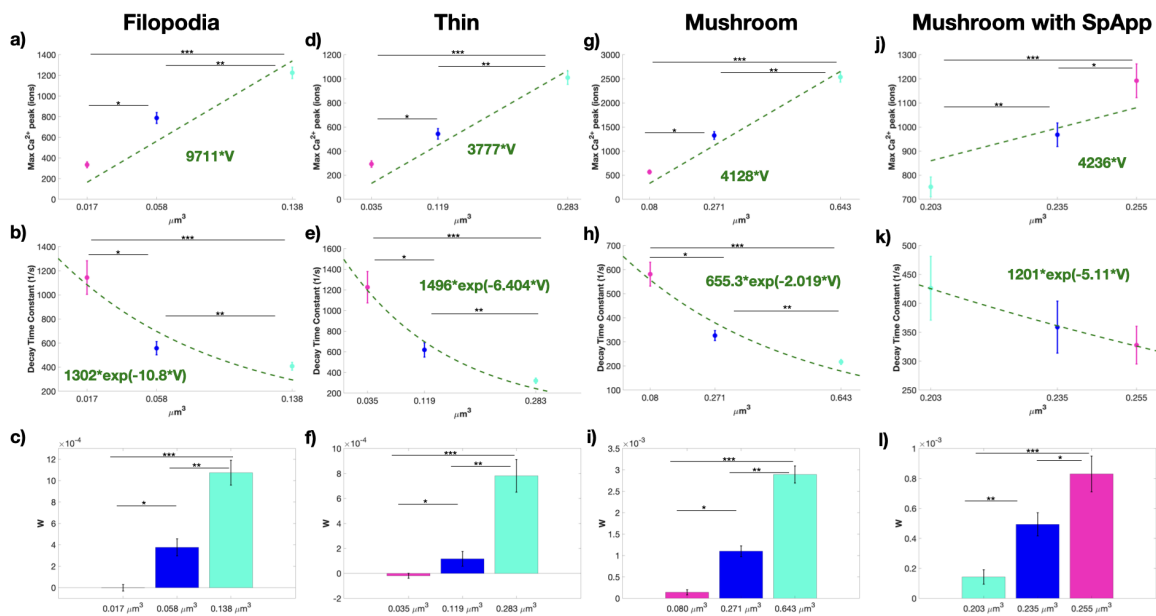

**Figure S1: Trends across volume are similar to trends across volume-to-surface area ratio** Peak calcium levels, decay time constant, and synaptic weight updates for size variations given as volumes for filopodia-shaped spines (a-c), thin spines (d-f), mushroom spines (g-i), and mushroom spines with spine apparatus (j-l). Peak calcium is fit with a line with a fixed zero intercept.

### 591 S1.7 Supplemental movies

#### 592 S1.7.1 Supplemental Movie S1

593 **Sample movie of idealized filopodia simulation.** A single seed of an idealized filopodia simula-  
 594 tion is shown for the whole time period from 0 to 35 ms. The plasma membrane mesh is shown in  
 595 blue and the  $\text{Ca}^{2+}$  ions are red.

#### 596 S1.7.2 Supplemental Movie S2

597 **Sample movie of idealized thin spine simulation.** A single seed of an idealized thin spine sim-  
 598 ulation is shown for the whole time period from 0 to 35 ms. The plasma membrane mesh is shown



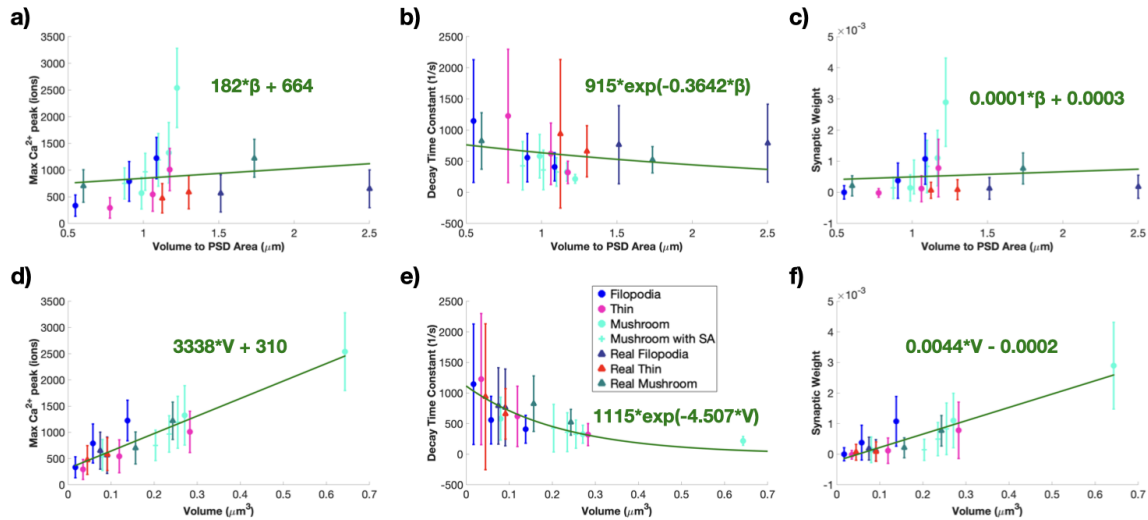

**Figure S2: Trends across volume-to-PSD area ratio and across volume show different levels of significance** a) All calcium peaks as mean and standard error ( $n=50$ ) across volume-to-PSD area ratio show no dependence. We fit the trend in peak values with a linear function against the volume-to-PSD area ratio;  $r^2 = 0.0152$  for the linear fit. b) We fit the decay dynamics of each calcium transient with  $c \cdot \exp(-kt)$  and report the decay time constant,  $k$ , as a mean and standard error ( $n = 50$ ) against volume-to-PSD area ratio. We fit the trend in decay time constants as a function of volume-to-PSD area ratio with an exponential  $a \cdot \exp(-b\beta)$ , where  $\beta$  is the volume-to-PSD area ratio;  $r^2 = 0.0091$  for the fit. c) Calculated synaptic weight change mean and standard error ( $n = 50$ ) at the last time point for all idealized and realistic spines shows no dependence on volume-to-PSD area ratio. We fit the trend in synaptic weight change with a linear function against the volume-to-PSD area ratio;  $r^2 = 0.0060$  for the linear fit. d) All calcium peaks as mean and standard error ( $n=50$ ) across volume show a clear increasing trend. We fit the trend in peak values with a linear function against volume;  $r^2 = 0.5666$  for the linear fit. e) We fit the decay dynamics of each calcium transient with  $c \cdot \exp(-kt)$  and report the decay time constant,  $k$ , as a mean and standard error ( $n = 50$ ) against volume. We fit the trend in decay time constants as a function of volume with an exponential  $a \cdot \exp(-bV)$ , where  $V$  is the volume;  $r^2 = 0.1478$  for the fit. f) Calculated synaptic weight change mean and standard error ( $n = 50$ ) at the last time point for all idealized and realistic spines shows an increasing trend. We fit the trend in synaptic weight change with a linear function against volume;  $r^2 = 0.4635$  for the linear fit.

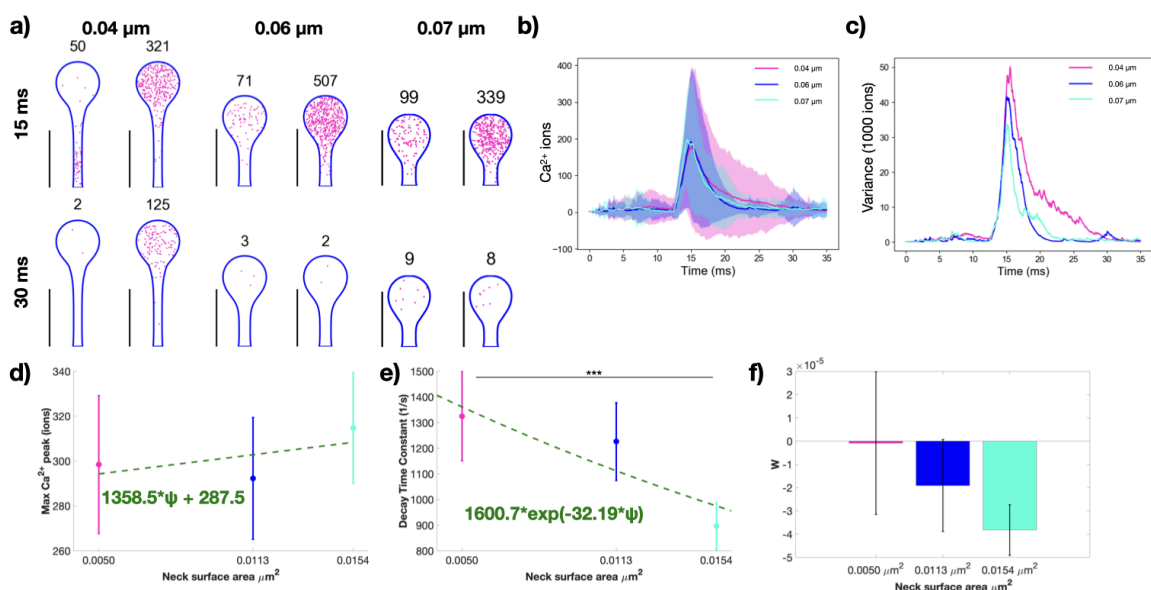

**Figure S3: Effect of spine neck variation on synaptic plasticity in thin spines.** a) Spatial plots at 15 and 30 ms for thin spines of the same volume with different neck geometries (neck radius of 0.04, 0.06, 0.07 μm). The number above each spine corresponds to the number of calcium ions present at that time point. Scale bar: 2 μm. Calcium ions over time (b) and variance (c) for all three thin spines with different neck cases. Shaded regions in (b) denote standard deviation. d) Peak calcium ion number for each thin spine with the mean and standard error (n=50) show no statistically significant differences using a two-tailed *t*-test. We fit the trend in peak calcium as a linear function of spine neck base surface area;  $r^2 = 0.0009$  for the linear fit. e) We fit the decay portion of each calcium transient with the exponential decay function  $c \cdot \exp(-kt)$ . The decay time constant mean and standard error (n=50),  $k$ , only shows statistically significant differences between the thin and thick necks;  $p^{***} = 0.0322$  from a two-tailed *t*-test. We fit the trend in decay time constants as a function of spine neck base surface area with an exponential  $a \cdot \exp(-b\psi)$ , where  $\psi$  is the spine neck base surface area;  $r^2 = 0.0256$  for the exponential fit. f) Calculated synaptic weight change at the last time point for all three thin spines shows no statistically significant difference due to neck size.

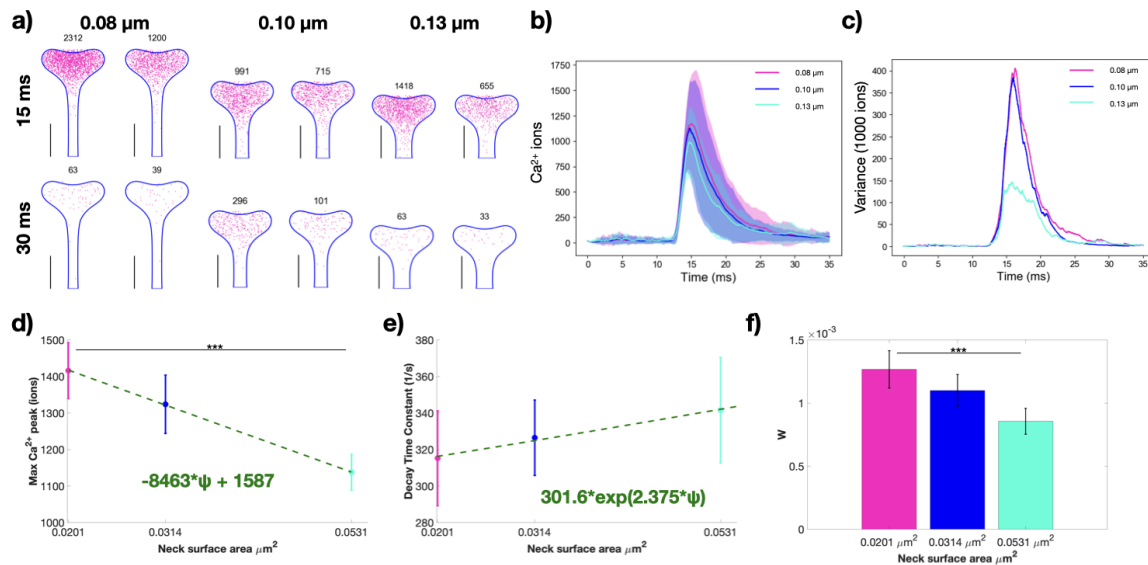

**Figure S4: Effect of spine neck variation on synaptic plasticity in mushroom spines.** a) Spatial plots at 15 and 30 ms for mushroom spines of the same volume with different neck geometries (neck radius of 0.08, 0.10, 0.13  $\mu\text{m}$ ). The number above each spine corresponds to the number of calcium ions present at that time point. Scale bar: 2  $\mu\text{m}$ . Calcium ions over time (b) and variance (c) for all three mushroom spines with different neck cases. Shaded regions in (b) denote standard deviation. d) Peak calcium ion number for each mushroom spine with the mean and standard error (n=50) show statistically significant differences between the thin and thick spines;  $p^{***} = 0.0029$  using a two-tailed  $t$ -test. We fit the trend in peak calcium as a linear function of spine neck base surface area;  $r^2 = 0.0528$  for the linear fit. e) We fit the decay portion of each calcium transient with the exponential decay function  $c \cdot \exp(-kt)$ . The decay time constant mean and standard error (n=50),  $k$ , shows no statistically significant differences from a two-tailed  $t$ -test. We fit the trend in decay time constants as a function of spine neck base surface area with an exponential  $a \cdot \exp(-b\psi)$ , where  $\psi$  is the spine neck base surface area;  $r^2 = 0.0036$  for the exponential fit. f) Calculated synaptic weight change at the last time point for all three mushroom spines only shows a statistically significant difference between the thin and thick spines,  $p^{***} = 0.0244$  from two-tailed  $t$ -test.

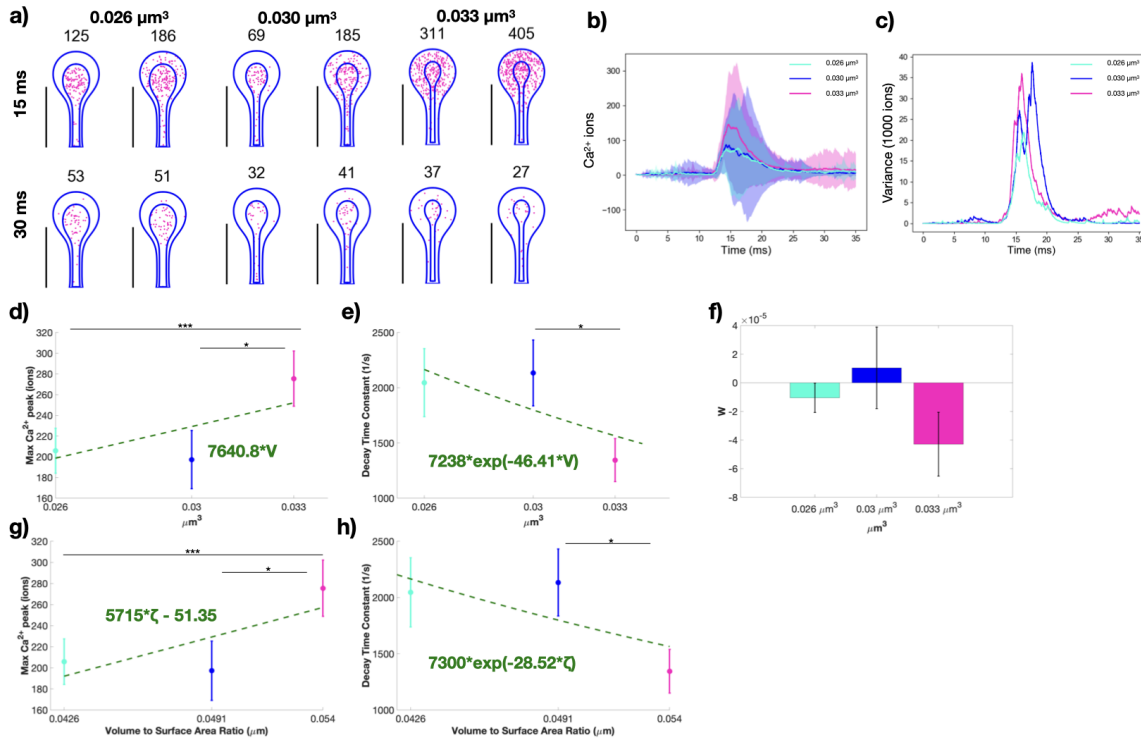

**Figure S5: Spine apparatus size modulates synaptic weight change in thin spines.** a) Spatial plots at 15 and 30 ms for thin spines with spine apparatus of different volumes (spine cytosolic volumes of 0.026, 0.030, 0.033  $\mu\text{m}^3$ ). The numbers on top of the shape indicate the total number of calcium ions at that instant in both the spine apparatus and cytoplasm. Calcium ions over time as mean and standard deviation (b) and variance (c) for all three thin spines with different spine apparatus sizes. Shaded regions in (b) denote standard deviation. d) Peak calcium ion number for each thin spine with a spine apparatus, with the mean and standard error (n=50), show statistically significant differences between two of the three paired cases;  $p^* = 0.0461$ ;  $p^{***} = 0.0453$  from two-tailed  $t$ -test. We fit the trend in peak values with a linear function against the cytoplasmic volume;  $r^2 = 0.0145$  for the linear fit. e) We fit the decay dynamics of each calcium transient with  $c \cdot \exp(-kt)$  and report the decay time constant,  $k$ , as a mean and standard error (n = 50). We find only statistically significant differences between the second and third spines;  $p^* = 0.0289$  from a two-tailed  $t$ -test. We fit the trend in decay time constants as a function of cytosolic volume with an exponential  $a \cdot \exp(-bV)$ , where  $V$  is the cytosolic volume;  $r^2 = 0.0177$  for the fit. f) Calculated synaptic weight change at the last time point for all three thin spines shows no statistically significant difference due to spine apparatus size. We also plot peak calcium ion number and decay time constant against the cytosolic volume to surface area ratio, g and h, respectively. g) We fit the trend in peak values with a linear function against the volume-to-surface area ratio;  $r^2 = 0.0214$  for the linear fit. h) We fit the trend in decay time constants as a function of volume-to-surface area ratio with an exponential  $a \cdot \exp(-b\zeta)$ , where  $\zeta$  is the volume-to-surface area ratio;  $r^2 = 0.0178$  for the fit.

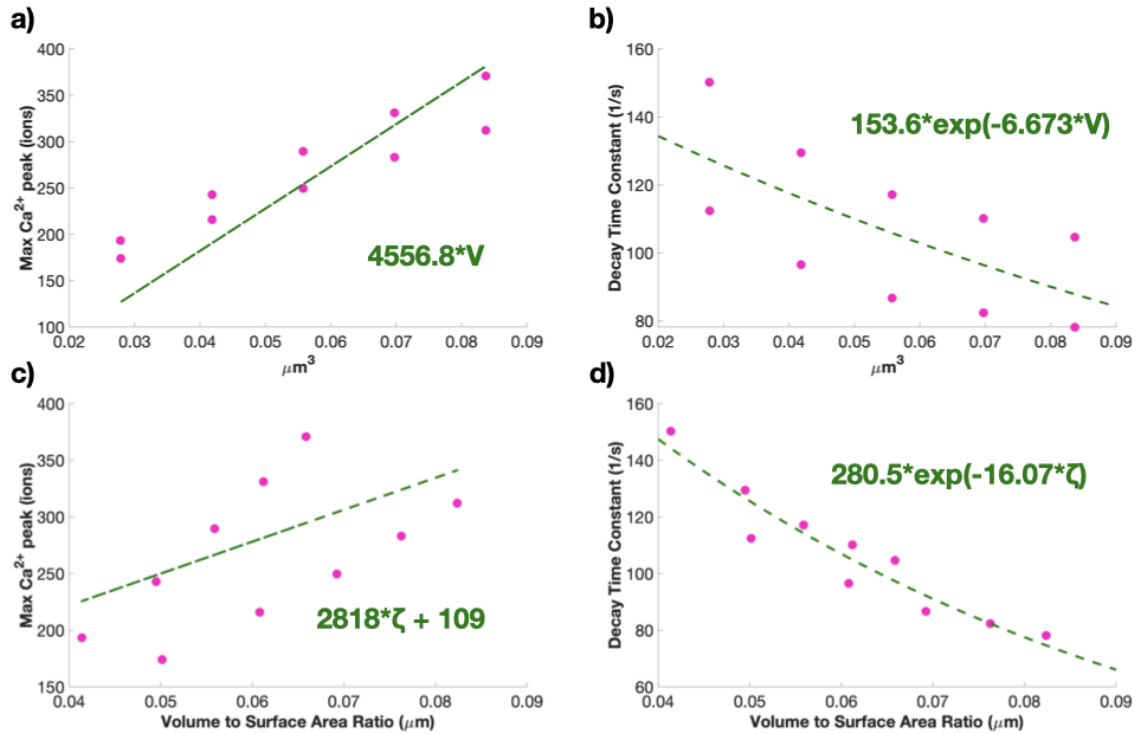

**Figure S6: Previous calcium simulation results match the qualitative trends in these results.** a) We fit the trend in peak values with a linear function against the cytoplasm volume;  $r^2 = 0.8242$  for the linear fit. We fix the y intercept at zero. b) We fit the decay dynamics of each calcium transient with  $c \cdot \exp(-kt)$  and report the decay time constant,  $k$ . We fit the trend in decay time constants as a function of cytosolic volume with an exponential  $a \cdot \exp(-bV)$ , where  $V$  is the cytosolic volume;  $r^2 = 0.4283$  for the fit. c) We fit the trend in peak values with a linear function against the volume-to-surface area ratio;  $r^2 = 0.8776$  for the linear fit. h) We fit the trend in decay time constants as a function of volume-to-surface area ratio with an exponential  $a \cdot \exp(-b\zeta)$ , where  $\zeta$  is the volume-to-surface area ratio;  $r^2 = 0.9054$  for the fit.

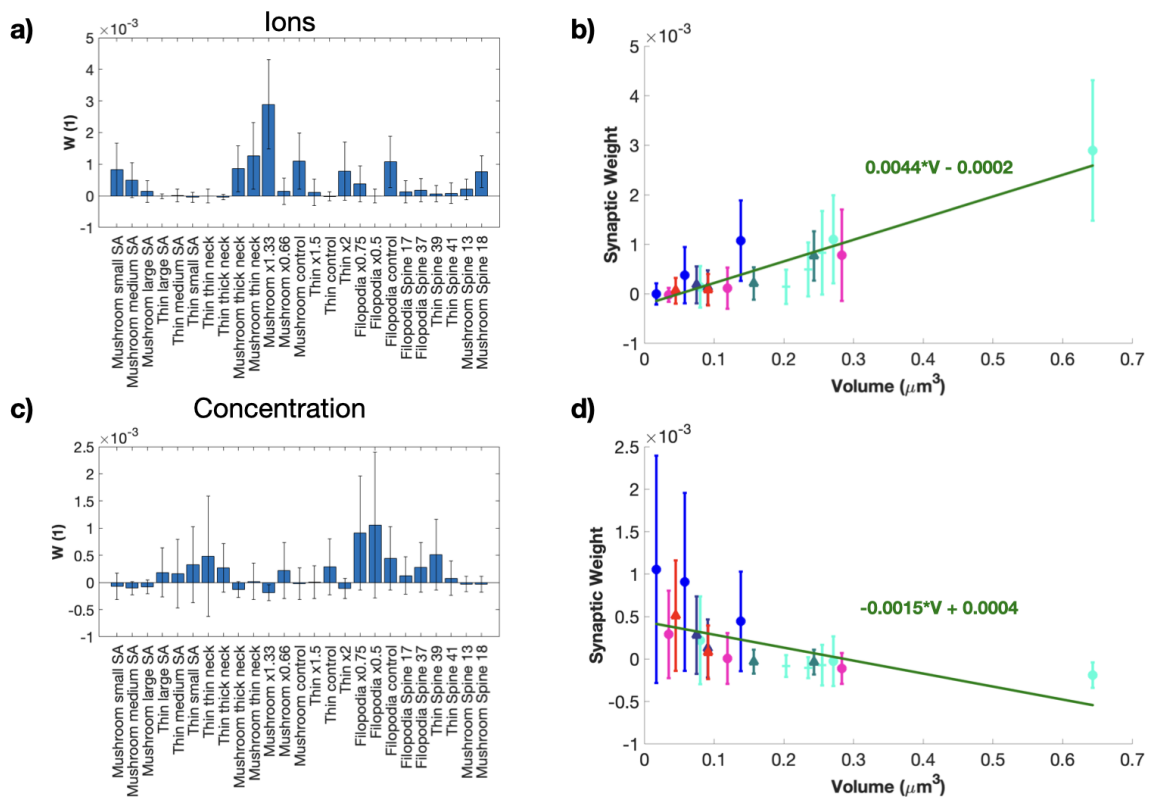

**Figure S7: Synaptic weight updates when considering  $\text{Ca}^{2+}$  in terms of ions or concentration** Synaptic weight updates for each stochastic idealized and real geometry simulation when synaptic weight calculations are in terms of ions (a-b) and concentration (c-d). We plot the synaptic weight changes against the spine volume for calculations using ions (b) and concentration (d). We fit the trends using a linear function of volume. We get  $r^2 = 0.4635$  for the ion fit and  $r^2 = 0.1229$  for the concentration fit.

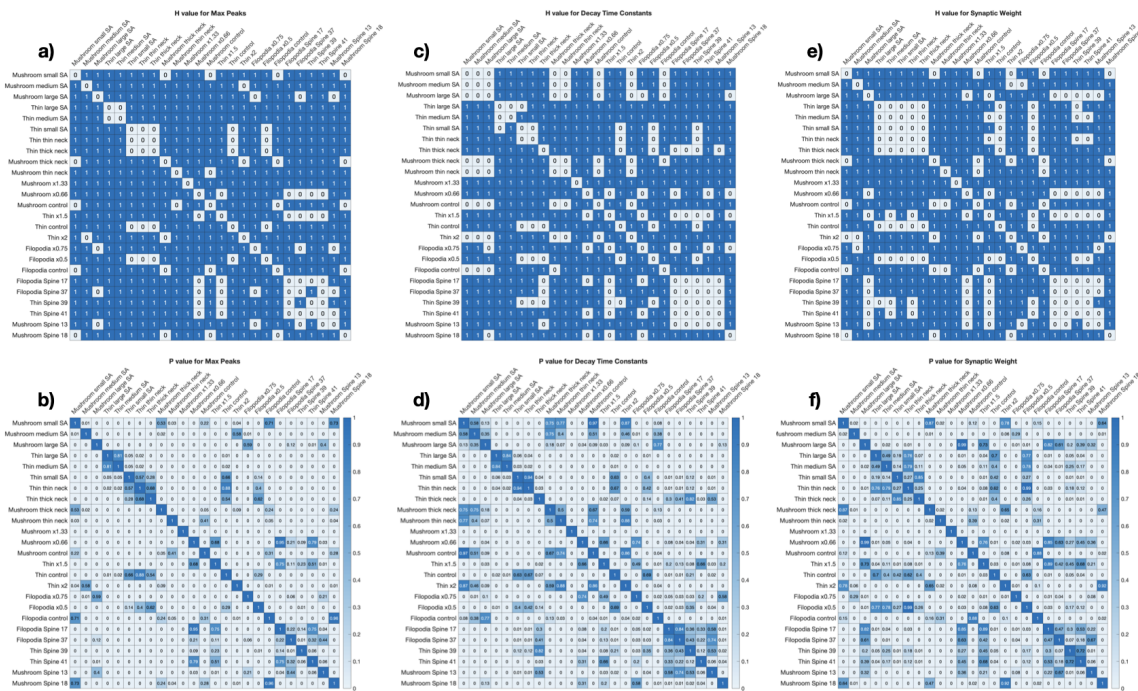

**Figure S8: Two-tailed  $t$ -test comparison between all simulations** We conduct two-tailed  $t$ -test between all simulations and display the h value and p value for max  $\text{Ca}^{2+}$  peaks (a-b), decay rate constant (c-d), and synaptic weight change (e-f). Displayed p values are truncated at two decimal points.

599 in blue and the  $\text{Ca}^{2+}$  ions are red.

### 600 S1.7.3 Supplemental Movie S3

601 **Sample movie of idealized mushroom spine simulation.** A single seed of an idealized mushroom spine simulation is shown for the whole time period from 0 to 35 ms. The plasma membrane mesh is shown in blue and the  $\text{Ca}^{2+}$  ions are red.

### 604 S1.7.4 Supplemental Movie S4

605 **Sample movie of realistic mushroom spine 13 simulation.** A single seed of a realistic mushroom spine 13 simulation is shown for the whole time period from 0 to 35 ms. The plasma membrane mesh is shown in blue and the  $\text{Ca}^{2+}$  ions are red.

### 608 S1.7.5 Supplemental Movie S5

609 **Sample movie of realistic filopodia 17 simulation.** A single seed of a realistic filopodia 17 simulation is shown for the whole time period from 0 to 35 ms. The plasma membrane mesh is shown in blue and the  $\text{Ca}^{2+}$  ions are red.

### 612 S1.7.6 Supplemental Movie S6

613 **Sample movie of realistic mushroom spine 18 simulation.** A single seed of a realistic mushroom spine 18 simulation is shown for the whole time period from 0 to 35 ms. The plasma mem-

615 brane mesh is shown in blue and the  $\text{Ca}^{2+}$  ions are red.

#### 616 **S1.7.7 Supplemental Movie S7**

617 **Sample movie of realistic filopodia 37 simulation.** A single seed of a realistic filopodia 37  
618 simulation is shown for the whole time period from 0 to 35 ms. The plasma membrane mesh is  
619 shown in blue and the  $\text{Ca}^{2+}$  ions are red.

#### 620 **S1.7.8 Supplemental Movie S8**

621 **Sample movie of realistic thin spine 39 simulation.** A single seed of a realistic thin spine 39  
622 simulation is shown for the whole time period from 0 to 35 ms. The plasma membrane mesh is  
623 shown in blue and the  $\text{Ca}^{2+}$  ions are red.

#### 624 **S1.7.9 Supplemental Movie S9**

625 **Sample movie of realistic thin spine 41 simulation.** A single seed of a realistic thin spine 41  
626 simulation is shown for the whole time period from 0 to 35 ms. The plasma membrane mesh is  
627 shown in blue and the  $\text{Ca}^{2+}$  ions are red.



## 628 References

- 629 1. J. Nishiyama, R. Yasuda, *Neuron* **87**, 63–75 (2015).
- 630 2. H. Murakoshi, R. Yasuda, *Trends in neurosciences* **35**, 135–143 (2012).
- 631 3. R. Yuste, W. Denk, *Nature* **375**, 682 (1995).
- 632 4. R. Yuste, A. Majewska, K. Holthoff, *Nature neuroscience* **3**, 653 (2000).
- 633 5. G. J. Augustine, F. Santamaria, K. Tanaka, *Neuron* **40**, 331–346 (2003).
- 634 6. C. E. Jahr, C. F. Stevens, *Proceedings of the National Academy of Sciences* **90**, 11573–
- 635 11577 (1993).
- 636 7. H. Z. Shouval, M. F. Bear, L. N. Cooper, *Proceedings of the National Academy of Sciences*
- 637 **99**, 10831–10836 (2002).
- 638 8. M. Graupner, N. Brunel, *Proceedings of the National Academy of Sciences* **109**, 3991–3996
- 639 (2012).
- 640 9. C. O’Donnell, M. F. Nolan, M. C. van Rossum, *Journal of Neuroscience* **31**, 16142–16156
- 641 (2011).
- 642 10. R. C. Malenka, J. A. Kauer, R. S. Zucker, R. A. Nicoll, *Science* **242**, 81–84 (1988).
- 643 11. J. A. Cummings, R. M. Mulkey, R. A. Nicoll, R. C. Malenka, *Neuron* **16**, 825–833 (1996).
- 644 12. L. C. Yeung, H. Z. Shouval, B. S. Blais, L. N. Cooper, *Proceedings of the National Academy*
- 645 *of Sciences* **101**, 14943–14948 (2004).
- 646 13. K. F. Lee, C. Soares, J.-C. Béïque, *Neural plasticity* **2012** (2012).
- 647 14. J. Lisman, *Philosophical Transactions of the Royal Society B: Biological Sciences* **372**, 20160260
- 648 (2017).
- 649 15. B. A. Earnshaw, P. C. Bressloff, *Journal of Neuroscience* **26**, 12362–12373 (2006).
- 650 16. J. Jędrzejewska-Szmek, S. Damodaran, D. B. Dorman, K. T. Blackwell, *European Journal of*
- 651 *Neuroscience* **45**, 1044–1056 (2017).
- 652 17. J. N. Bourne, K. M. Harris, *Annu. Rev. Neurosci.* **31**, 47–67 (2008).
- 653 18. R. Calizo *et al.*, *Scientific reports* **10**, 1–17 (2020).
- 654 19. S. R. Neves *et al.*, *Cell* **133**, 666–680 (2008).
- 655 20. P. Rangamani *et al.*, *Cell* **154**, 1356–1369 (2013).
- 656 21. L. Héja, Z. Szabó, M. Péter, J. Kardos, *Frontiers in Cellular Neuroscience* **15**, 14 (2021).
- 657 22. M. Bell, T. Bartol, T. Sejnowski, P. Rangamani, *Journal of General Physiology* **151**, 1017–
- 658 1034 (2019).
- 659 23. A. Cugno, T. M. Bartol, T. J. Sejnowski, R. Iyengar, P. Rangamani, *Scientific reports* **9**, 1–18
- 660 (2019).
- 661 24. T. M. Bartol *et al.*, *Frontiers in synaptic neuroscience* **7**, 17 (2015).
- 662 25. N. Volfovsky, H. Parnas, M. Segal, E. Korkotian, *Journal of neurophysiology* **82**, 450–462
- 663 (1999).
- 664 26. D. Holcman, Z. Schuss, E. Korkotian, *Biophysical journal* **87**, 81–91 (2004).
- 665 27. M. J. Higley, B. L. Sabatini, *Neuron* **59**, 902–913 (2008).
- 666 28. H. Anwar, I. Hepburn, H. Nedelescu, W. Chen, E. De Schutter, *Journal of Neuroscience* **33**,
- 667 15848–15867 (2013).
- 668 29. J. T. Dudman, M. F. Nolan, *PLoS Comput Biol* **5**, e1000290 (2009).
- 669 30. A. A. Faisal, J. A. White, S. B. Laughlin, *Current Biology* **15**, 1143–1149 (2005).
- 670 31. R. C. Cannon, C. O’Donnell, M. F. Nolan, *PLoS Comput Biol* **6**, e1000886 (2010).
- 671 32. C. O’Donnell, M. F. Nolan, in *The Computing Dendrite* (Springer, 2014), pp. 397–414.

- 672 33. J. R. Stiles, T. M. Bartol, *et al.*, *Computational neuroscience: realistic modeling for experi-*  
673 *mentalists*, 87–127 (2001).
- 674 34. J. R. Stiles, D. Van Helden, T. M. Bartol, E. E. Salpeter, M. M. Salpeter, *Proceedings of the*  
675 *National Academy of Sciences of the United States of America*, 5747–5752 (1996).
- 676 35. R. A. Kerr *et al.*, *SIAM journal on scientific computing* **30**, 3126–3149 (2008).
- 677 36. H. Alimohamadi, M. Bell, S. Halpain, P. Rangamani, *bioRxiv* (2020).
- 678 37. A. S. Ozcan, *Frontiers in synaptic neuroscience* **9**, 12 (2017).
- 679 38. P. García-López, V. García-Marín, M. Freire, *Neural plasticity* **2010** (2010).
- 680 39. N. Ofer, D. R. Berger, N. Kasthuri, J. W. Lichtman, R. Yuste, *bioRxiv*, DOI 10.1101/2021.  
681 02.18.431725 (2021).
- 682 40. R. Yuste, *Dendritic spines* (MIT press, 2010).
- 683 41. M. Jasinska *et al.*, *PloS one* **14**, e0225394 (2019).
- 684 42. M. A. Chirillo, M. S. Waters, L. F. Lindsey, J. N. Bourne, K. M. Harris, *Scientific reports* **9**,  
685 1–14 (2019).
- 686 43. J. Spacek, K. M. Harris, *Journal of Neuroscience* **17**, 190–203 (1997).
- 687 44. A. Perez-Alvarez *et al.*, *Nature communications* **11**, 1–10 (2020).
- 688 45. B. L. Sabatini, T. G. Oertner, K. Svoboda, *Neuron* **33**, 439–452 (2002).
- 689 46. Y. Wu *et al.*, *Proceedings of the National Academy of Sciences* **114**, E4859–E4867 (2017).
- 690 47. C. T. Lee *et al.*, *PLOS Comp Bio* (2020).
- 691 48. J. H. Kotaleski, K. T. Blackwell, *Nature Reviews Neuroscience* **11**, 239–251 (2010).
- 692 49. R. Yasuda, *Biophysical journal* **113**, 2152–2159 (2017).
- 693 50. R. Yuste, T. Bonhoeffer, *Nature Reviews Neuroscience* **5**, 24–34 (2004).
- 694 51. I. S. Stein, K. Zito, *The Neuroscientist* **25**, 27–47 (2019).
- 695 52. D. A. Ruhl *et al.*, *Nature communications* **10**, 1–14 (2019).
- 696 53. C. Lohmann, T. Bonhoeffer, *Neuron* **59**, 253–260 (2008).
- 697 54. K. E. Sorra, K. M. Harris, *Hippocampus* **10**, 501–511 (2000).
- 698 55. G. Mahajan, S. Nadkarni, *The Journal of physiology* **597**, 3473–3502 (2019).
- 699 56. R. L. Wasserstein, A. L. Schirm, N. A. Lazar, *Moving to a world beyond “p < 0.05”*, 2019.
- 700 57. D. Ohadi, P. Rangamani, *Biophysical journal* **117**, 1981–1994 (2019).
- 701 58. T. Mäki-Marttunen, N. Iannella, A. G. Edwards, G. T. Einevoll, K. T. Blackwell, *Elife* **9**, e55714  
702 (2020).
- 703 59. U. S. Bhalla, *Biophysical Journal* **87**, 733–744 (2004).
- 704 60. D. Ohadi *et al.*, *Biophysical journal* **117**, 1963–1980 (2019).
- 705 61. C. Miermans, R. Kusters, C. Hoogenraad, C. Storm, *PloS one* **12**, e0170113 (2017).
- 706 62. K. Basnayake *et al.*, *PLoS biology* **17**, e2006202 (2019).
- 707 63. M. K. Bell, P. Rangamani, *Current Opinion in Systems Biology* (2021).
- 708 64. C. T. Lee, M. Akamatsu, P. Rangamani, *Current Opinion in Cell Biology* **71**, 38–45 (2021).
- 709 65. A. Hayer, U. S. Bhalla, *PLoS Comput Biol* **1**, e20 (2005).
- 710 66. M. Ordyan, T. Bartol, M. Kennedy, P. Rangamani, T. Sejnowski, *PLoS computational biology*  
711 **16**, e1008015 (2020).
- 712 67. M. Bonilla-Quintana, F. Wörgötter, C. Tetzlaff, M. Fauth, *Frontiers in synaptic neuroscience*  
713 **12**, 9 (2020).
- 714 68. P. Rangamani, G. Y. Xiong, R. Iyengar, *Progress in molecular biology and translational sci-*  
715 *ence* **123**, 143–167 (2014).

- 716 69. L. N. Cornelisse, R. A. van Elburg, R. M. Meredith, R. Yuste, H. D. Mansvelder, *PloS one* **2**,  
717 e1073 (2007).
- 718 70. R. Robinson, R. Stokes, *Electrolyte Solutions, Butterworths Scientific Publications*, 1959.
- 719 71. B. Schwaller, *Cold Spring Harbor perspectives in biology*, a004051 (2010).
- 720 72. M. Vargas-Caballero, H. P. Robinson, *Journal of Neuroscience* **24**, 6171–6180 (2004).
- 721 73. P. Jonas, G. Major, B. Sakmann, *Journal of Physiology* **472**, 615–663 (1993).
- 722 74. T. Griffith, K. Tsaneva-Atanasova, J. R. Mellor, *PLoS computational biology* **12**, e1004949  
723 (2016).
- 724 75. J. Schoberl, *Comput Visual Sci* **1**, 41–52 (1997).
- 725 76. M. Borczyk, M. A. Sliwinska, A. Caly, T. Bernas, K. Radwanska, *Scientific Reports* **9** (2019).
- 726 77. C. T. Lee *et al.*, *Biophysical Journal* **118**, 1003–1008, issn: 0006-3495, DOI 10.1016/j.  
727 bpj.2019.11.3400, (2020; [http://www.sciencedirect.com/science/article/pii/  
728 S0006349520300357](http://www.sciencedirect.com/science/article/pii/S0006349520300357)) (Mar. 10, 2020).
